# Supplementary material for: Total synthesis, structural revision and biological evaluation of γ-elemene-type sesquiterpenes
Source: Royal Society of Chemistry journal article supplement (doi:10.1039/c8ob02005a), 2018-01-01

# Supporting Information

## **Total synthesis, structural revision and biological evaluation of $\gamma$ -elemene-type sesquiterpenes**

Changchun Yuan,\* Shangyong Zhong, Xingyi Li, Yanhong Wang, Miao-Miao Xun, Yunli  
Bai, Kongkai Zhu\*

*<sup>a</sup>National Demonstration Center for Experimental Chemical Engineering Comprehensive Education,  
School of Chemical Engineering and Technology, North University of China, Taiyuan 030000, P.R.  
China*

*<sup>b</sup>School of Biological Science and Technology, University of Jinan, Jinan 250022, P.R. China*

*\*Corresponding author: ycc543700483@nuc.edu.cn; bio\_zhukk@ujn.edu.cn*

## Table of Contents

|                                                                                                              |     |
|--------------------------------------------------------------------------------------------------------------|-----|
| <b>Tables S1, S2, S3, S4, S5, S6, S7 and S8 (NMR comparison between synthetic and natural samples)</b> ..... | S3  |
| <b>Tables S9 (<sup>1</sup>H and <sup>13</sup>C NMR data for compounds 6b)</b> .....                          | S11 |
| <b>Figure 1 Key NOESY correlations and selected HMBC correlations of compound 6b</b> .....                   | S11 |
| <b>References</b> .....                                                                                      | S12 |
| <b>Spectra for Compounds</b> .....                                                                           | S13 |

**Table S1. Comparison of <sup>1</sup>H NMR data of natural elem-1,3,7,8-tetraen-8,12-olide<sup>[1]</sup> (300 MHz) with those of synthetic elem-1,3,7,8-tetraen-8,12-olide (3) (600 MHz)**

| Position | Natural, 300 MHz, CDCl <sub>3</sub> ,<br>δ <sub>H</sub> (mult. <i>J</i> in Hz) | Synthetic, 600 MHz, CDCl <sub>3</sub> ,<br>δ <sub>H</sub> (mult. <i>J</i> in Hz) | Δδ*<br>(ppm) |
|----------|--------------------------------------------------------------------------------|----------------------------------------------------------------------------------|--------------|
| 1        | 5.80 <sup>△</sup> (5.81) <sup>◇</sup> (dd, 10.5, 17.3)                         | 5.84 (dd, 10.8, 17.4)                                                            | 0.03         |
| 2a       | 5.05 (dd, 0.6, 10.5)                                                           | 5.07 (d, 10.8)                                                                   | 0.02         |
| 2b       | 4.99 (dd, 0.6, 17.3)                                                           | 5.01 (d, 17.4)                                                                   | 0.02         |
| 3a       | 4.90 (m)                                                                       | 4.93 (m)                                                                         | 0.03         |
| 3b       | 4.75 (br s)                                                                    | 4.78 (br s)                                                                      | 0.02         |
| 4        | --                                                                             | --                                                                               | --           |
| 5        | 2.45 (dd, 5.2, 8.3)                                                            | 2.47 (dd, 4.8, 8.4)                                                              | 0.02         |
| 6a       | 2.76 <sup>△</sup> (2.72) <sup>◇</sup> (dd, 5.3, 17.2)                          | 2.74 (ddd, 1.2, 4.8, 16.8)                                                       | 0.02         |
| 6b       | 2.65 <sup>△</sup> (2.61) <sup>◇</sup> (dd, 8.2, 17.2)                          | 2.63 (ddd, 1.2, 8.4, 17.3)                                                       | 0.02         |
| 7        | --                                                                             | --                                                                               | --           |
| 8        | --                                                                             | --                                                                               | --           |
| 9        | 5.45 (s)                                                                       | 5.47 (s)                                                                         | 0.02         |
| 10       | --                                                                             | --                                                                               | --           |
| 11       | --                                                                             | --                                                                               | --           |
| 12       | --                                                                             | --                                                                               | --           |
| 13       | 1.86 (br s)                                                                    | 1.89 (s)                                                                         | 0.03         |
| 14       | 1.13 (s)                                                                       | 1.15 (s)                                                                         | 0.02         |
| 15       | 1.68 (br s)                                                                    | 1.70 (s)                                                                         | 0.02         |

\*The chemical shift of synthetic product minus the chemical shift of natural product.

<sup>△</sup>Wrong characterization data of natural product in reported paper.<sup>1</sup>

<sup>◇</sup>The correct characterization data of natural product is on the basis of the ESI<sup>†</sup> in reported paper.<sup>1</sup>

**Table S2. Comparison of  $^{13}\text{C}$  NMR data of natural elem-1,3,7,8-tetraen-8,12-olide<sup>[1]</sup> (75 MHz) with those of synthetic elem-1,3,7,8-tetraen-8,12-olide (3) (150 MHz)**

| Position | Natural, 75 MHz, $\text{CDCl}_3$ ,<br>$\delta_{\text{C}}$ (ppm) | Synthetic, 150 MHz, $\text{CDCl}_3$ ,<br>$\delta_{\text{C}}$ (ppm) | $\Delta\delta^*$<br>(ppm) |
|----------|-----------------------------------------------------------------|--------------------------------------------------------------------|---------------------------|
| 1        | 146.1                                                           | 146.0                                                              | -0.1                      |
| 2        | 113.7                                                           | 113.6                                                              | -0.1                      |
| 3        | 114.9                                                           | 114.9                                                              | 0.0                       |
| 4        | 145.4                                                           | 145.3                                                              | -0.1                      |
| 5        | 50.9                                                            | 50.9                                                               | 0.0                       |
| 6        | 25.6                                                            | 25.6                                                               | 0.0                       |
| 7        | 149.1                                                           | 149.0                                                              | -0.1                      |
| 8        | 148.1                                                           | 148.0                                                              | -0.1                      |
| 9        | 114.6                                                           | 114.5                                                              | -0.1                      |
| 10       | 42.1                                                            | 42.0                                                               | -0.1                      |
| 11       | 120.6                                                           | 120.5                                                              | -0.1                      |
| 12       | 171.6                                                           | 171.4                                                              | -0.2                      |
| 13       | 8.7                                                             | 8.6                                                                | -0.1                      |
| 14       | 22.2                                                            | 22.2                                                               | 0.0                       |
| 15       | 24.0                                                            | 23.9                                                               | -0.1                      |

\*The chemical shift of synthetic product minus the chemical shift of Natural product.

**Table S3. Comparison of <sup>1</sup>H NMR data of natural elema-1,3,7(11),8-tetraen-8,12-lactam<sup>[2]</sup> (600 MHz) with those of synthetic elema-1,3,7(11),8-tetraen-8,12-lactam (4) (600 MHz)**

| Position  | Natural, 600 MHz, CDCl <sub>3</sub> ,<br>δ <sub>H</sub> (mult. <i>J</i> in Hz) | Synthetic, 600 MHz, CDCl <sub>3</sub> ,<br>δ <sub>H</sub> (mult. <i>J</i> in Hz) | Δδ*<br>(ppm) |
|-----------|--------------------------------------------------------------------------------|----------------------------------------------------------------------------------|--------------|
| 1         | 5.84 (dd, 10.8, 17.4)                                                          | 5.84 (dd, 10.2, 17.4)                                                            | 0.00         |
| 2a        | 5.04 (d, 10.8)                                                                 | 5.04 (dd, 0.8, 10.8)                                                             | 0.00         |
| 2b        | 4.99 (d, 17.4)                                                                 | 4.99 (dd, 0.8, 17.4)                                                             | 0.00         |
| 3a        | 4.89 (s)                                                                       | 4.89 (s)                                                                         | 0.00         |
| 3b        | 4.75 (s)                                                                       | 4.76 (s)                                                                         | 0.01         |
| 4         | --                                                                             | --                                                                               | --           |
| 5         | 2.45 (dd, 4.8, 9.0)                                                            | 2.46 (dd, 5.4, 8.4)                                                              | 0.01         |
| 6a        | 2.68 (dd, 4.8, 17.4)                                                           | 2.69 (ddd, 1.0, 4.8, 16.8)                                                       | 0.01         |
| 6b        | 2.58 (dd, 9.0, 17.4)                                                           | 2.58 (ddd, 1.2, 10.2, 17.4)                                                      | 0.00         |
| 7         | --                                                                             | --                                                                               | --           |
| 8         | --                                                                             | --                                                                               | --           |
| 9         | 5.27 (s)                                                                       | 5.29 (s)                                                                         | 0.02         |
| 10        | --                                                                             | --                                                                               | --           |
| 11        | --                                                                             | --                                                                               | --           |
| 12        | --                                                                             | --                                                                               | --           |
| 13        | 1.85 (s)                                                                       | 1.86 (s)                                                                         | 0.01         |
| 14        | 1.12 (s)                                                                       | 1.12 (s)                                                                         | 0.00         |
| 15        | 1.69 (s)                                                                       | 1.69 (s)                                                                         | 0.00         |
| <i>NH</i> | 7.46 (br s)                                                                    | 7.68 (br s)                                                                      | 0.22         |

\*The chemical shift of synthetic product minus the chemical shift of natural product.

**Table S4. Comparison of  $^{13}\text{C}$  NMR data of natural elema-1,3,7(11),8-tetraen-8,12-lactam<sup>[2]</sup> (150 MHz) with those of synthetic elema-1,3,7(11),8-tetraen-8,12-lactam (4) (150 MHz)**

| Position | Natural, 150 MHz, $\text{CDCl}_3$ ,<br>$\delta_{\text{C}}$ (ppm) | Synthetic, 150 MHz, $\text{CDCl}_3$ ,<br>$\delta_{\text{C}}$ (ppm) | $\Delta\delta^*$<br>(ppm) |
|----------|------------------------------------------------------------------|--------------------------------------------------------------------|---------------------------|
| 1        | 146.6                                                            | 146.7                                                              | 0.1                       |
| 2        | 113.0                                                            | 113.0                                                              | 0.0                       |
| 3        | 114.3                                                            | 114.3                                                              | 0.0                       |
| 4        | 146.1                                                            | 146.1                                                              | 0.0                       |
| 5        | 51.3                                                             | 51.4                                                               | 0.1                       |
| 6        | 25.3                                                             | 25.3                                                               | 0.0                       |
| 7        | 141.3                                                            | 141.3                                                              | 0.0                       |
| 8        | 136.6                                                            | 136.6                                                              | 0.0                       |
| 9        | 116.1                                                            | 115.9                                                              | -0.2                      |
| 10       | 41.9                                                             | 42.0                                                               | 0.1                       |
| 11       | 124.8                                                            | 125.0                                                              | 0.2                       |
| 12       | 173.5                                                            | 173.2                                                              | -0.3                      |
| 13       | 8.5                                                              | 8.3                                                                | -0.2                      |
| 14       | 22.0                                                             | 22.0                                                               | 0.0                       |
| 15       | 23.9                                                             | 24.0                                                               | 0.1                       |

\*The chemical shift of synthetic product minus the chemical shift of Natural product.

**Table S5. Comparison of <sup>1</sup>H NMR data of natural hydroxyisogermafurenolide<sup>[3]</sup> (600 MHz) with those of synthetic hydroxyisogermafurenolide (5) (600 MHz)**

| Position | Natural, 600 MHz, CDCl <sub>3</sub> ,<br>δ <sub>H</sub> (mult. <i>J</i> in Hz) | Synthetic, 600 MHz, CDCl <sub>3</sub> ,<br>δ <sub>H</sub> (mult. <i>J</i> in Hz) | Δδ*<br>(ppm) |
|----------|--------------------------------------------------------------------------------|----------------------------------------------------------------------------------|--------------|
| 1        | 5.70                                                                           | 5.70 (dd, 10.8, 17.4)                                                            | 0.00         |
| 2a       | 5.00                                                                           | 5.00 (d, 10.8)                                                                   | 0.00         |
| 2b       | 4.97                                                                           | 4.97 (d 16.8)                                                                    | 0.00         |
| 3a       | 4.98                                                                           | 4.99 (s)                                                                         | 0.01         |
| 3b       | 4.74                                                                           | 4.74 (s)                                                                         | 0.00         |
| 4        | --                                                                             | --                                                                               | --           |
| 5        | 2.05                                                                           | 2.05 (dd, 3.0, 13.2)                                                             | 0.00         |
| 6a       | 2.56                                                                           | 2.56 (dd, 3.6, 13.8)                                                             | 0.00         |
| 6b       | 2.72                                                                           | 2.72 (t, 13.8)                                                                   | 0.00         |
| 7        | --                                                                             | --                                                                               | --           |
| 8        | --                                                                             | --                                                                               | --           |
| 9a       | 1.76 (d)                                                                       | 1.76 (d, 12.6)                                                                   | 0.00         |
| 9b       | 2.14 (d)                                                                       | 2.14 (d, 14.4)                                                                   | 0.00         |
| 10       | --                                                                             | --                                                                               | --           |
| 11       | --                                                                             | --                                                                               | --           |
| 12       | --                                                                             | --                                                                               | --           |
| 13       | 1.83                                                                           | 1.83 (s)                                                                         | 0.00         |
| 14       | 1.27                                                                           | 1.27 (s)                                                                         | 0.00         |
| 15       | 1.77                                                                           | 1.77 (s)                                                                         | 0.01         |
| -OH      | 3.01                                                                           | 2.95 (b s)                                                                       | 0.06         |

\*The chemical shift of synthetic product minus the chemical shift of Natural product.

**Table S6. Comparison of  $^{13}\text{C}$  NMR data of natural hydroxyisogermafurenolide<sup>[3]</sup> (75 MHz) with those of synthetic hydroxyisogermafurenolide (5) (150 MHz)**

| Position | Natural, 400 MHz, $\text{CDCl}_3$ ,<br>$\delta_{\text{C}}$ (ppm) | Synthetic, 150 MHz, $\text{CDCl}_3$ ,<br>$\delta_{\text{C}}$ (ppm) | $\Delta\delta^*$<br>(ppm) |
|----------|------------------------------------------------------------------|--------------------------------------------------------------------|---------------------------|
| 1        | 147.4                                                            | 147.6                                                              | 0.2                       |
| 2        | 112.0                                                            | 112.1                                                              | 0.1                       |
| 3        | 114.2                                                            | 114.3                                                              | 0.1                       |
| 4        | 144.7                                                            | 144.9                                                              | 0.2                       |
| 5        | 54.2                                                             | 54.4                                                               | 0.2                       |
| 6        | 27.1                                                             | 27.2                                                               | 0.1                       |
| 7        | 160.1                                                            | 160.2                                                              | 0.1                       |
| 8        | 102.8                                                            | 102.9                                                              | 0.1                       |
| 9        | 49.3                                                             | 49.5                                                               | 0.2                       |
| 10       | 40.6                                                             | 40.8                                                               | 0.2                       |
| 11       | 122.0                                                            | 122.2                                                              | 0.2                       |
| 12       | 171.9                                                            | 172.0                                                              | 0.1                       |
| 13       | 8.2                                                              | 8.4                                                                | 0.2                       |
| 14       | 17.7                                                             | 17.9                                                               | 0.2                       |
| 15       | 24.4                                                             | 24.5                                                               | 0.2                       |

\*The chemical shift of synthetic product minus the chemical shift of Natural product.



**Table S7. Comparison of <sup>1</sup>H NMR data of natural 8β-methoxy-isogermafurenolide<sup>41</sup> (600 MHz) with those of synthetic 8β-methoxy-isogermafurenolide (6a) (600 MHz)**

| Position | Natural, 600 MHz, CD <sub>3</sub> OD,<br>δ <sub>H</sub> (mult. <i>J</i> in Hz) | Synthetic, 600 MHz, CD <sub>3</sub> OD,<br>δ <sub>H</sub> (mult. <i>J</i> in Hz) | Δδ*<br>(ppm) |
|----------|--------------------------------------------------------------------------------|----------------------------------------------------------------------------------|--------------|
| 1        | 5.76 (dd, 10.7, 17.6)                                                          | 5.76 (dd, 10.8, 17.4)                                                            | 0.00         |
| 2a       | 4.96 (d, 10.7)                                                                 | 4.96 (dd, 0.6, 11.4)                                                             | 0.00         |
| 2b       | 4.95 (d, 17.6)                                                                 | 4.95 (dd, 1.2, 17.6)                                                             | 0.00         |
| 3a       | 4.97 (s)                                                                       | 4.98 (s)                                                                         | 0.01         |
| 3b       | 4.76 (s)                                                                       | 4.77 (s)                                                                         | 0.01         |
| 4        | --                                                                             | --                                                                               | --           |
| 5        | 2.13 (dd, 4.1, 13.4)                                                           | 2.14 (dd, 3.6, 12.6)                                                             | 0.01         |
| 6a       | 2.63 (dd, 4.1, 13.4)                                                           | 2.63 (dd, 4.2, 13.8)                                                             | 0.00         |
| 6b       | 2.58 (t, 13.4)                                                                 | 2.59 (dt, 1.2, 12.6)                                                             | 0.01         |
| 7        | --                                                                             | --                                                                               | --           |
| 8        | --                                                                             | --                                                                               | --           |
| 9a       | 1.66 (d, 13.7)                                                                 | 1.67 (d, 13.8)                                                                   | 0.01         |
| 9b       | 2.10 (d, 13.7)                                                                 | 2.10 (d, 13.8)                                                                   | 0.00         |
| 10       | --                                                                             | --                                                                               | --           |
| 11       | --                                                                             | --                                                                               | --           |
| 12       | --                                                                             | --                                                                               | --           |
| 13       | 1.84 (s)                                                                       | 1.85 (d, 1.2)                                                                    | 0.01         |
| 14       | 1.77 (s)                                                                       | 1.77 (s)                                                                         | 0.00         |
| 15       | 1.20 (s)                                                                       | 1.21 (s)                                                                         | 0.01         |
| -OMe     | 3.14 (s)                                                                       | 3.15 (s)                                                                         | 0.01         |

\*The chemical shift of synthetic product minus the chemical shift of Natural product.

**Table S8. Comparison of  $^{13}\text{C}$  NMR data of natural 8 $\beta$ -methoxy-isogermafurenolide<sup>[4]</sup> (75 MHz) with those of synthetic 8 $\beta$ -methoxy-isogermafurenolide (6a) (150 MHz)**

| Position   | Natural, 75 MHz, CD <sub>3</sub> OD, | Synthetic, 150 MHz, CD <sub>3</sub> OD, | $\Delta\delta^*$ |
|------------|--------------------------------------|-----------------------------------------|------------------|
|            | $\delta_{\text{C}}$ (ppm)            | $\delta_{\text{C}}$ (ppm)               | (ppm)            |
| 1          | 149.5                                | 149.3                                   | -0.2             |
| 2          | 112.3                                | 112.2                                   | -0.1             |
| 3          | 114.6                                | 114.5                                   | -0.1             |
| 4          | 146.6                                | 146.4                                   | -0.2             |
| 5          | 55.4                                 | 55.2                                    | -0.2             |
| 6          | 28.5                                 | 28.3                                    | -0.2             |
| 7          | 160.8                                | 160.7                                   | -0.1             |
| 8          | 107.7                                | 107.5                                   | -0.2             |
| 9          | 49.8                                 | 49.6                                    | -0.2             |
| 10         | 42.0                                 | 41.8                                    | -0.2             |
| 11         | 125.4                                | 125.2                                   | -0.2             |
| 12         | 173.8                                | 173.6                                   | -0.2             |
| 13         | 8.2                                  | 8.1                                     | -0.1             |
| 14         | 25.0                                 | 24.9                                    | -0.1             |
| 15         | 18.1                                 | 18.0                                    | -0.1             |
| <i>OMe</i> | 50.8                                 | 50.6                                    | -0.2             |

\*The chemical shift of synthetic product minus the chemical shift of Natural product.

**Table S9. <sup>1</sup>H and <sup>13</sup>C NMR data for compound 6b\***

| Position | $\delta_C$ (ppm) | $\delta_H$ (ppm, <i>J</i> in Hz)                        |
|----------|------------------|---------------------------------------------------------|
| 1        | 148.7            | 6.22 (dd, 10.8, 17.4)                                   |
| 2        | 110.2            | 5.08 (d, 17.4); 4.97 (d, 11.4)                          |
| 3        | 113.9            | 4.86 (s); 4.68 (s)                                      |
| 4        | 148.3            | --                                                      |
| 5        | 49.9             | 2.77 (t, 4.8)                                           |
| 6        | 28.0             | 2.69 - 2.68 (m)                                         |
| 7        | 159.4            | --                                                      |
| 8        | 107.7            | --                                                      |
| 9        | 46.6             | $\alpha H$ , 2.26 (d, 14.4); $\beta H$ , 1.89 (d, 14.4) |
| 10       | 40.8             | --                                                      |
| 11       | 127.0            | --                                                      |
| 12       | 173.4            | --                                                      |
| 13       | 8.4              | 1.83 (s)                                                |
| 14       | 25.5             | 1.75 (t, 0.6 Hz)                                        |
| 15       | 26.3             | 1.00 (s)                                                |
| OMe      | 50.4             | 3.07 (s)                                                |

\*<sup>1</sup>H NMR spectra recorded at 600 MHz, <sup>13</sup>C NMR spectra recorded at 150 MHz; the spectra of **6a** was obtained in CD<sub>3</sub>OD.

**Figure 1 Key NOESY correlations and selected HMBC correlations of compound 6b**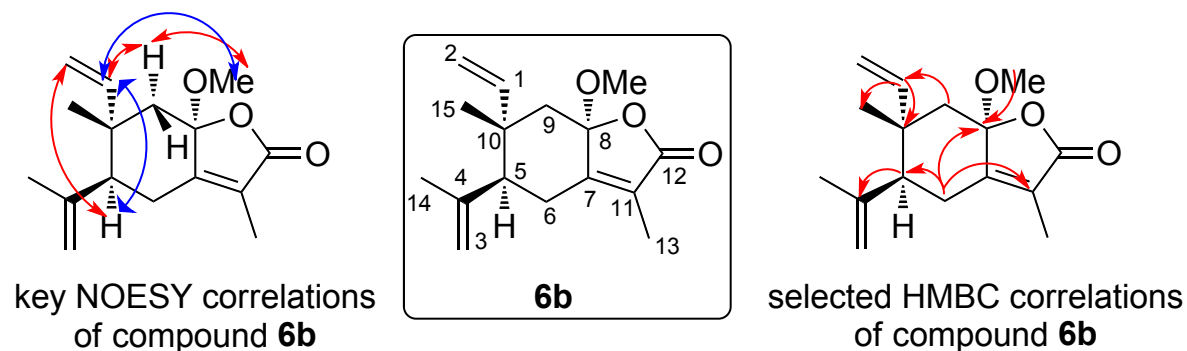

## References:

- [1] G. Xia, L. Zhou, J. Ma, Y. Wang, L. Ding, F. Zhao, L. Chen, F. Qiu, *Fitoterapia* **2015**, *103*, 143-148.
- [2] G. Qiu, P. Yan, W. Shao, J. Zhou, W. Lin, L. Fang, X. Zhao, J. Dong, *Chem. Pharm. Bull.* **2013**, *61*, 983-986.
- [3] D. Friedrich, F. Bohlmann, *Tetrahedron* **1988**, *44*, 1369-1392.
- [4] J. -Hao, Ma, F. Zhao, Y. Wang, Y. Liu, S. -Y. Gao, L. -Q. Ding, L. -X. Chen, F. Qiu, *Org. Biomol. Chem.* **2015**, *13*, 8349-8358.

## Spectra for Compounds

$^1\text{H}$  NMR spectra of compound **12** in  $\text{CDCl}_3$  (600 MHz)

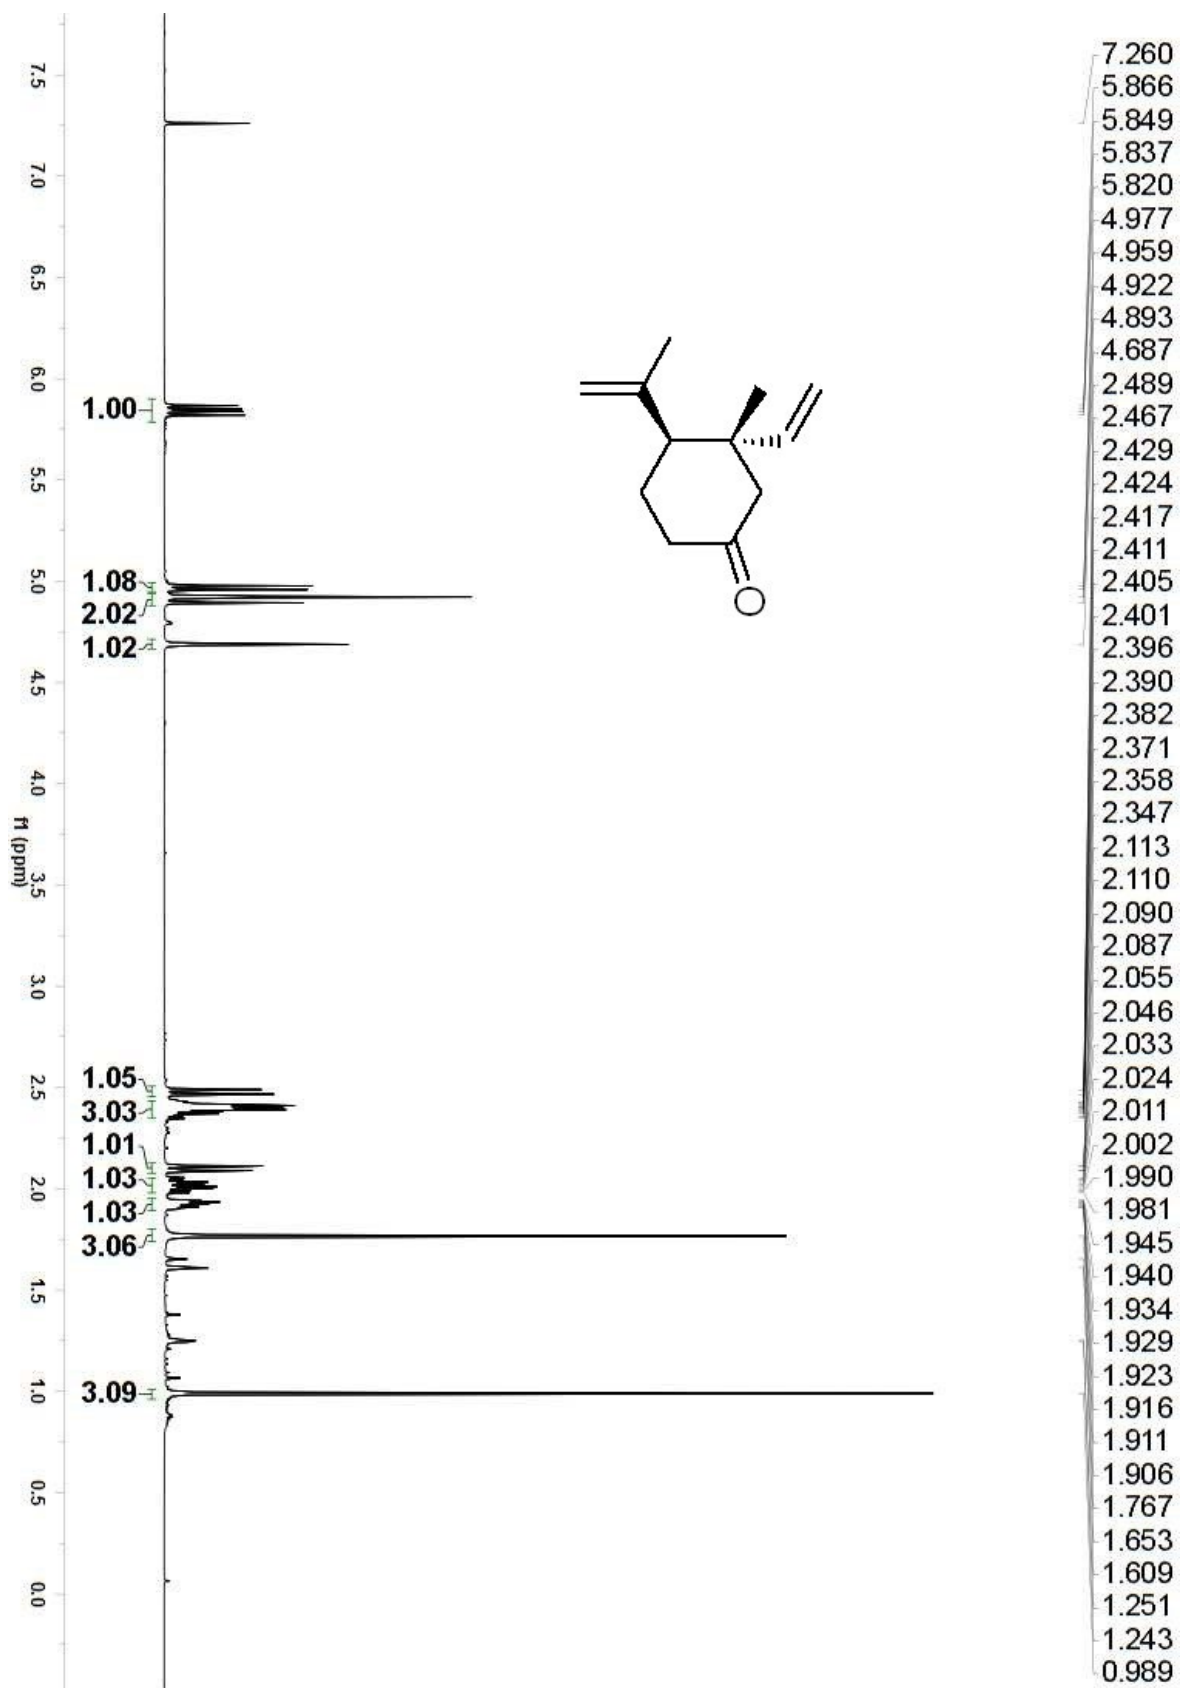

<sup>13</sup>C NMR spectra of compound **12** in CDCl<sub>3</sub> (150 MHz)

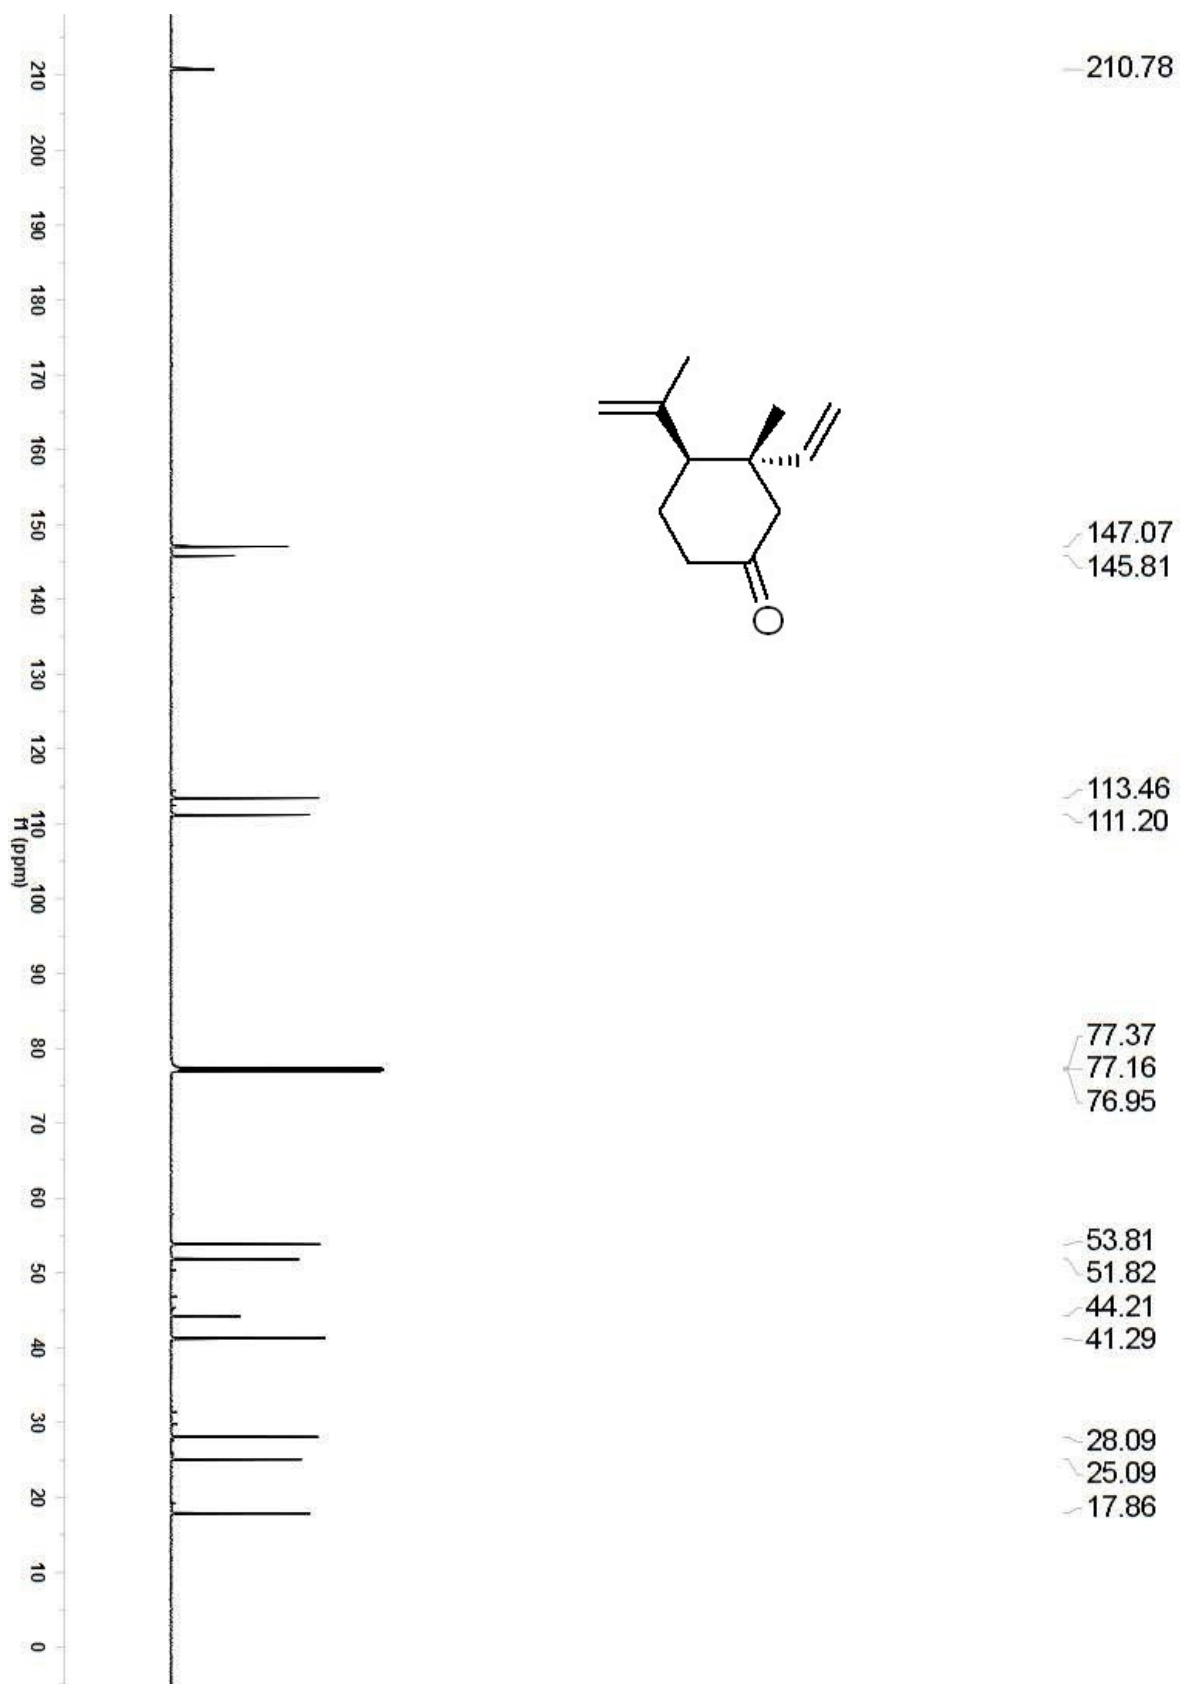

<sup>1</sup>H NMR spectra of compound **3** in CDCl<sub>3</sub> (600 MHz)

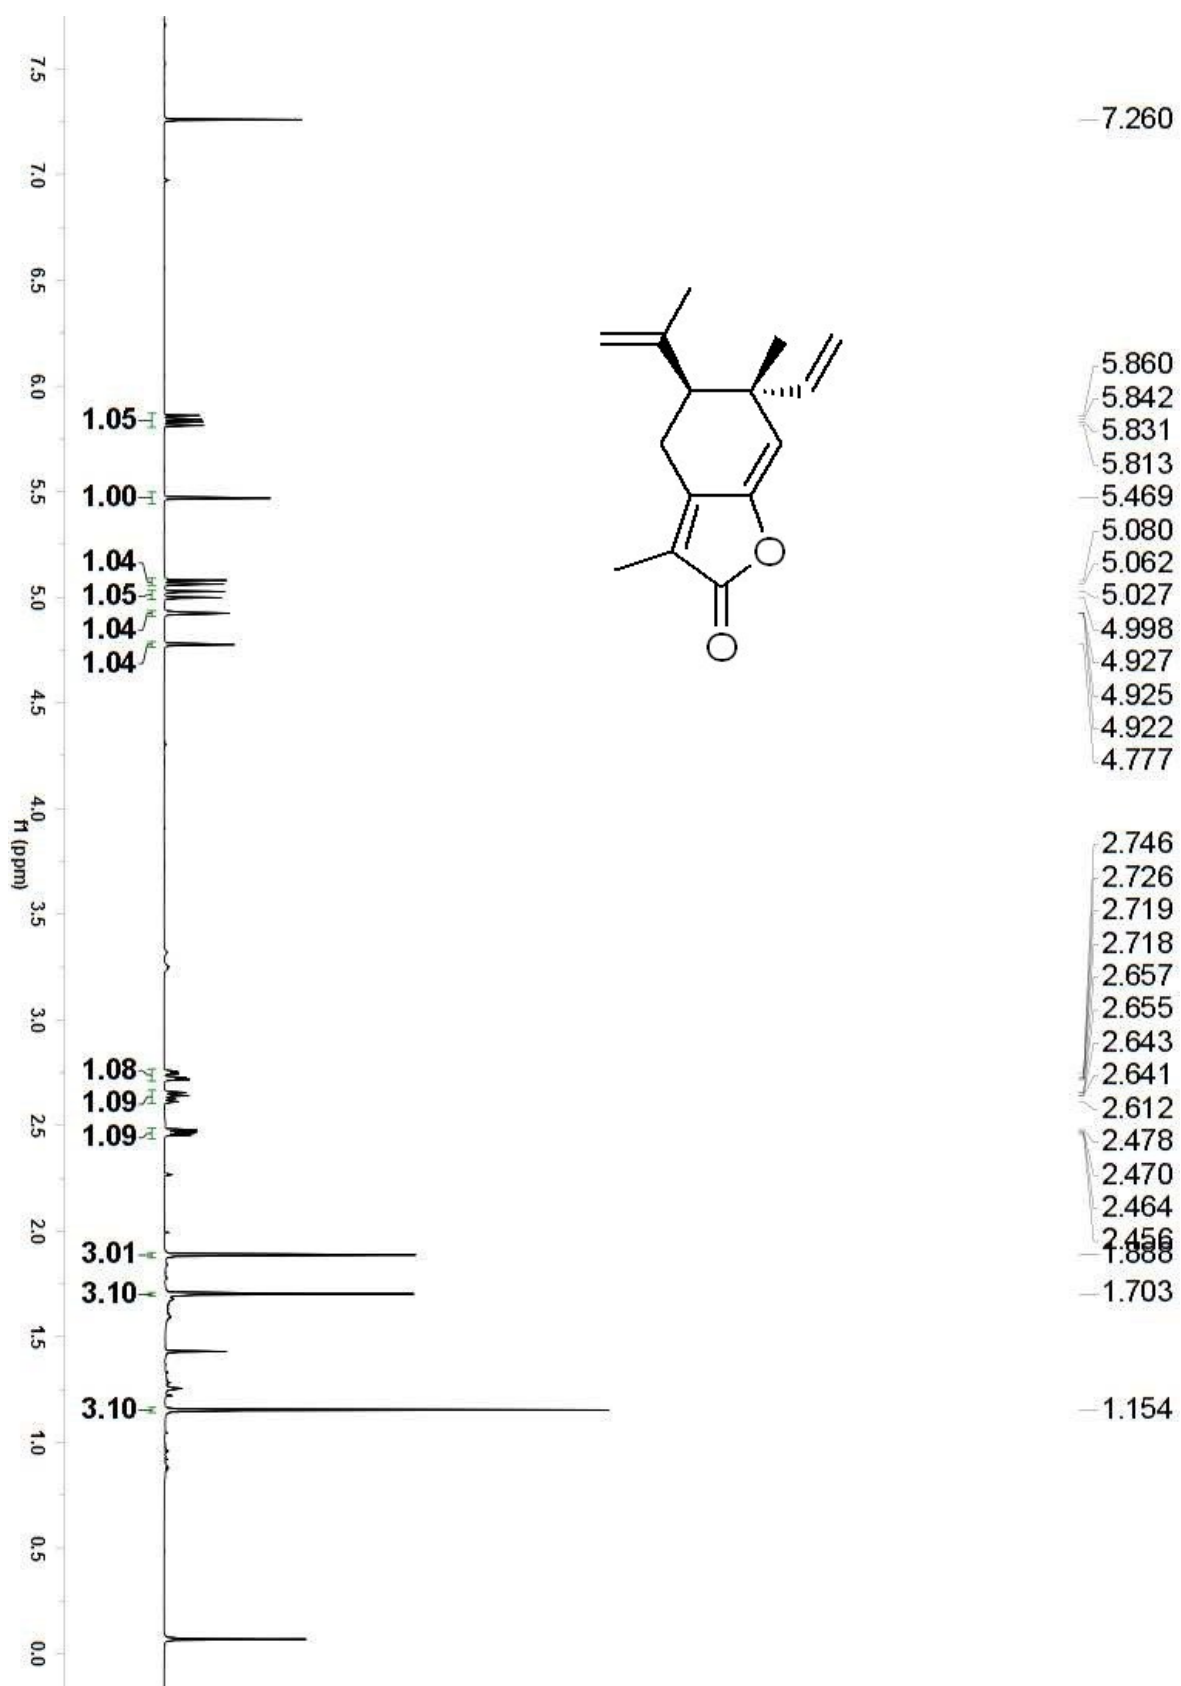

<sup>13</sup>C NMR spectra of compound **3** in CDCl<sub>3</sub> (150 MHz)

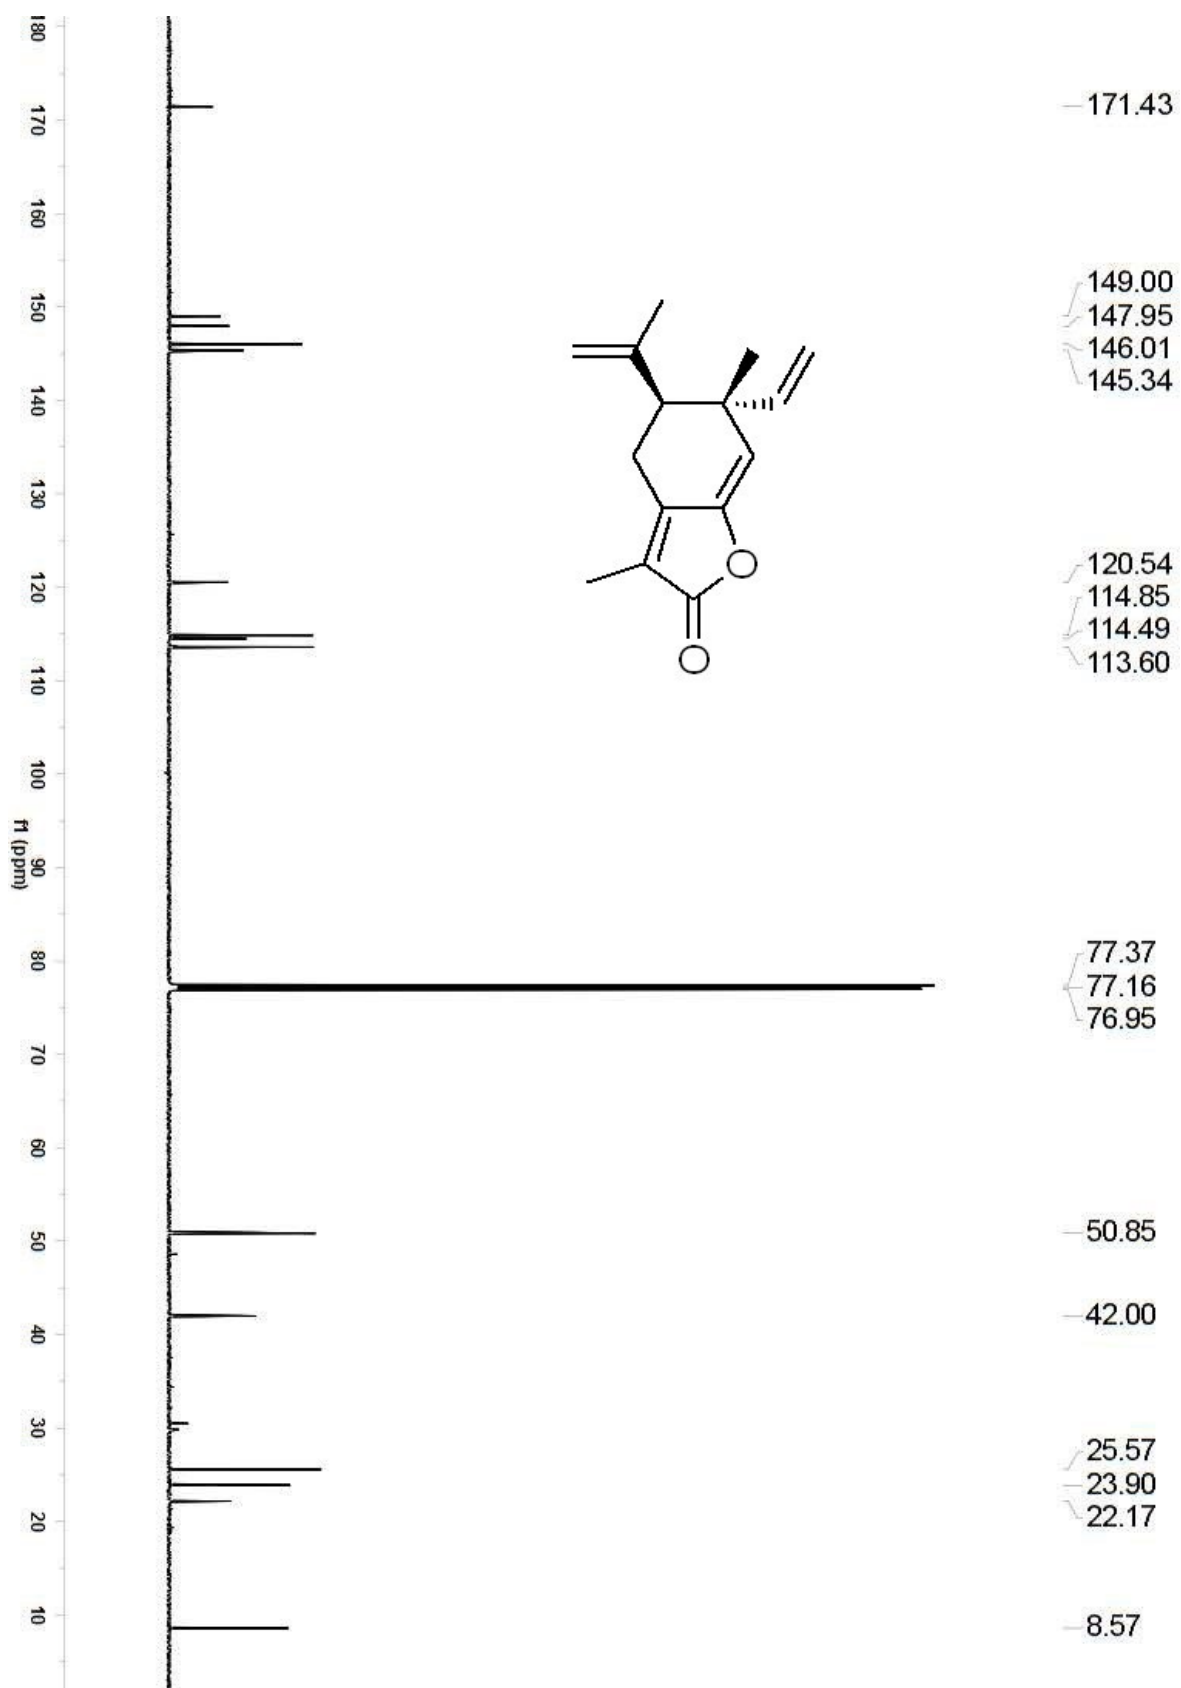



<sup>1</sup>H NMR spectra of compound 4 in CDCl<sub>3</sub> (600 MHz)

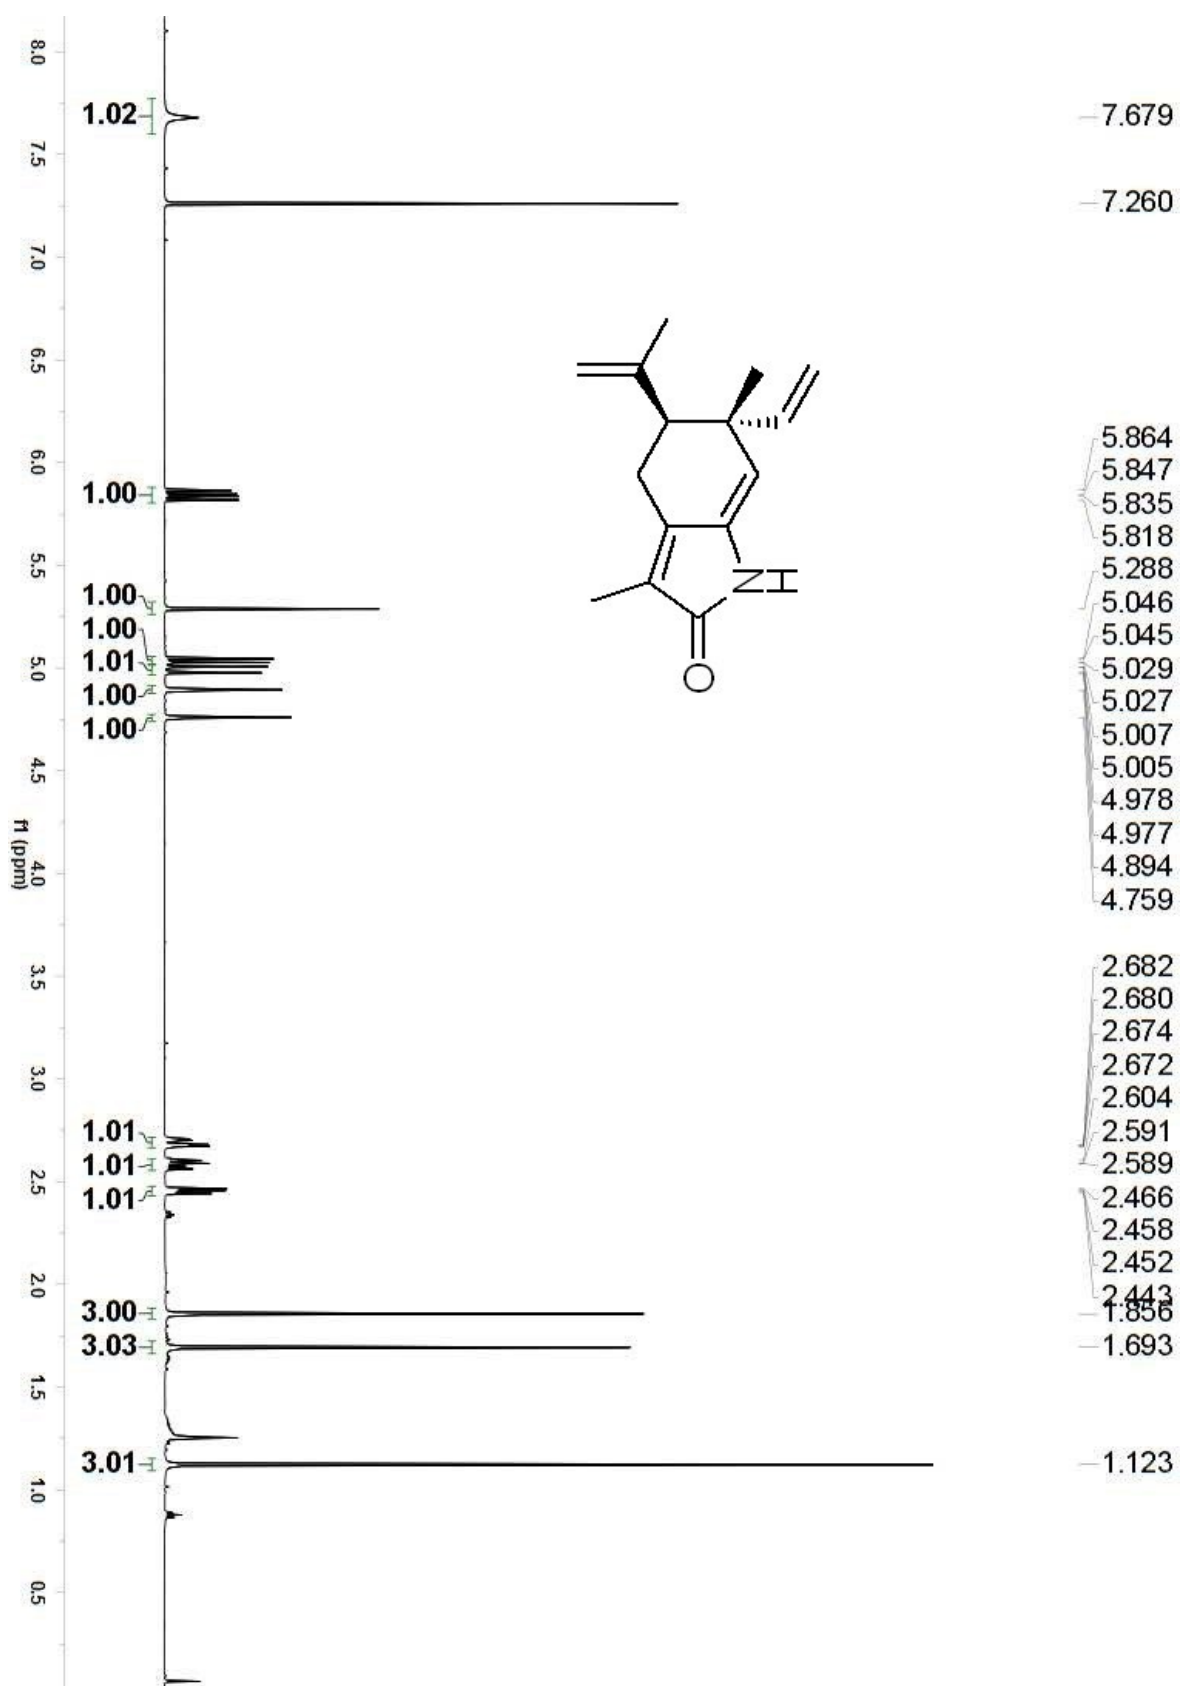

$^{13}\text{C}$  NMR spectra of compound **4** in  $\text{CDCl}_3$  (150 MHz)

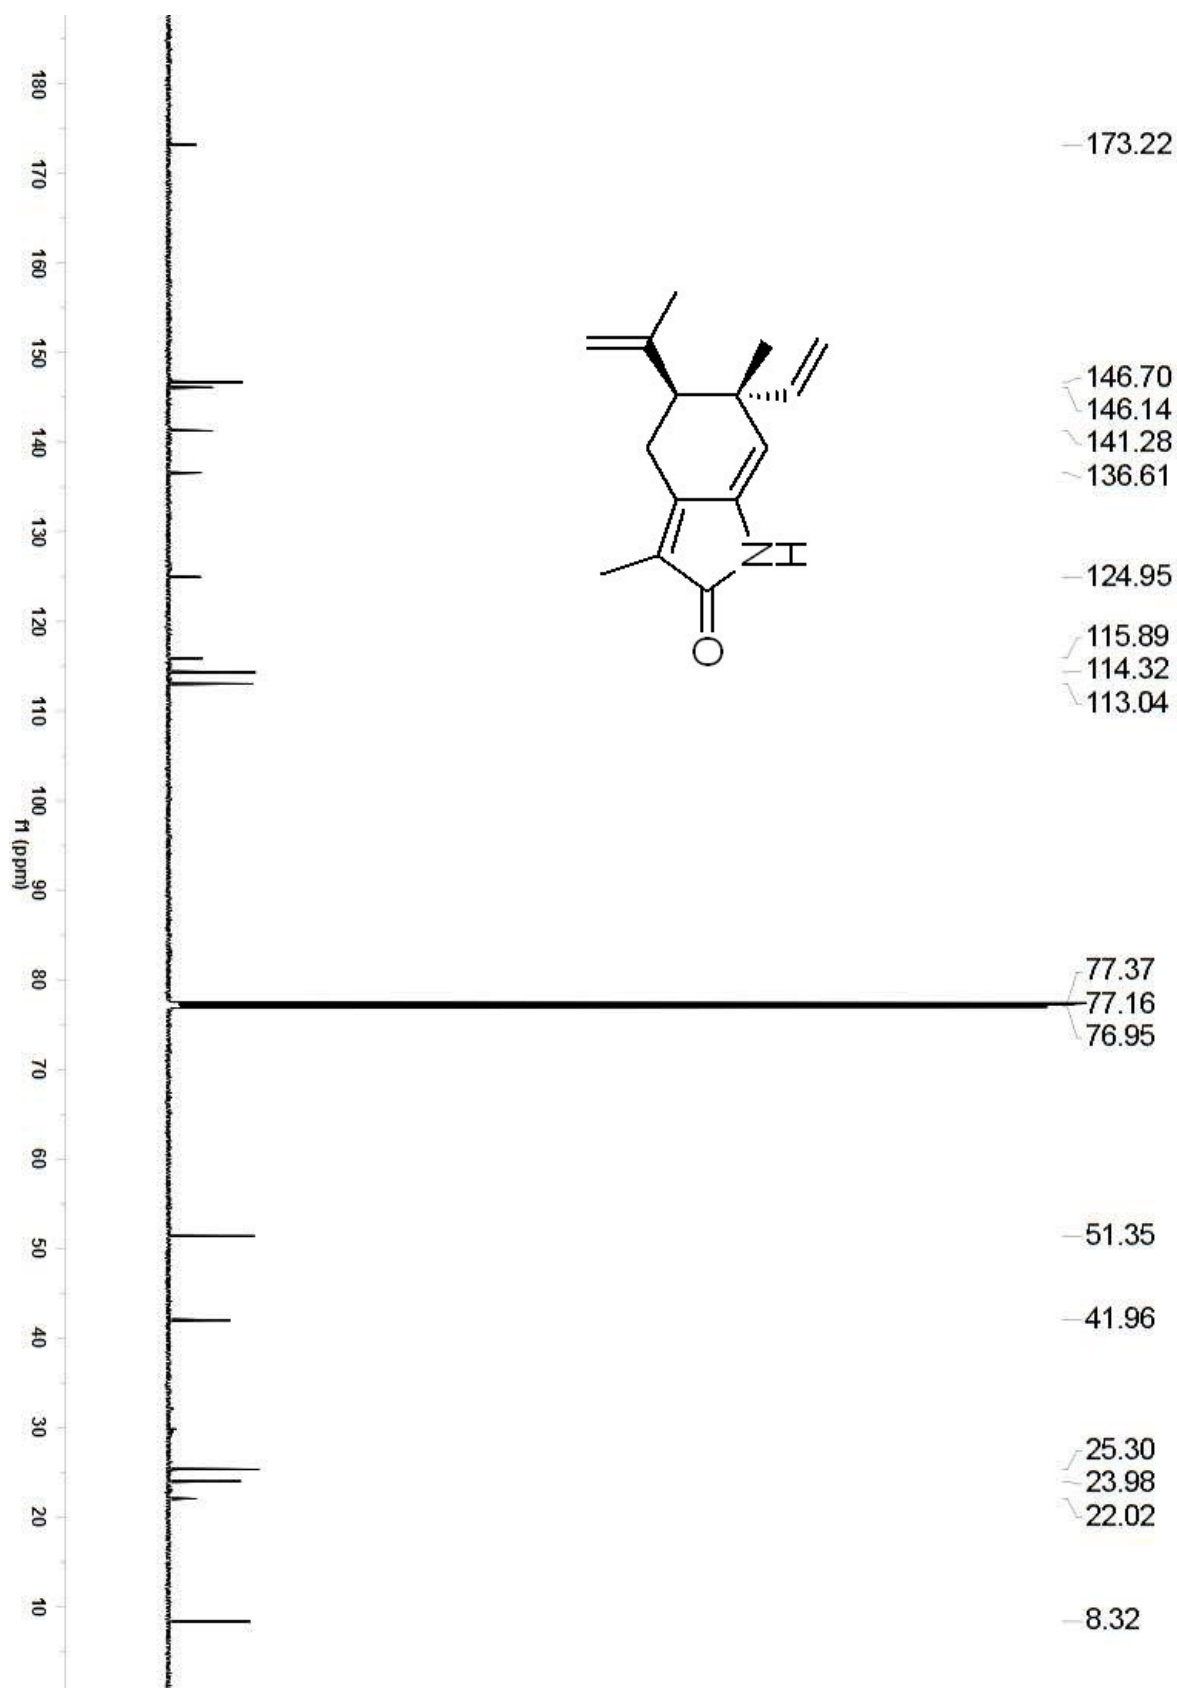

<sup>1</sup>H NMR spectra of compound **5** in CDCl<sub>3</sub> (600 MHz)

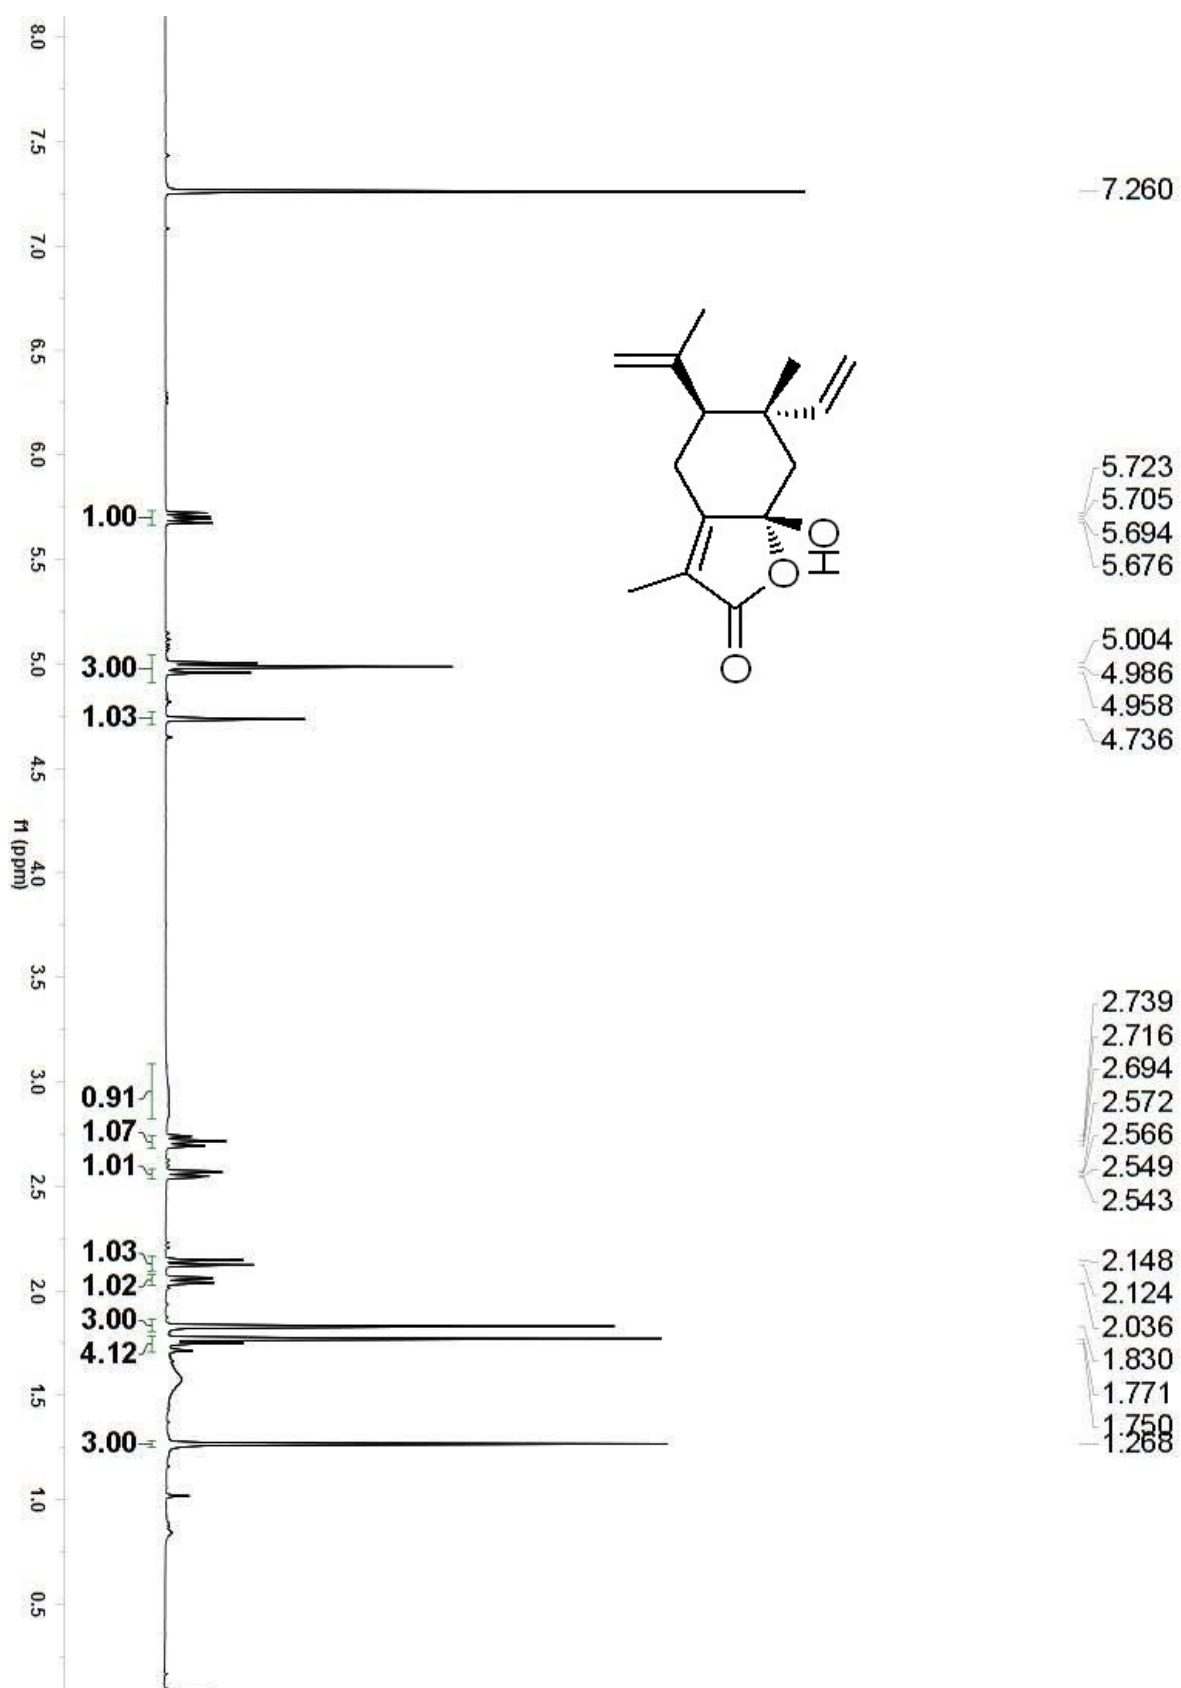

<sup>13</sup>C NMR spectra of compound **5** in CDCl<sub>3</sub> (150 MHz)

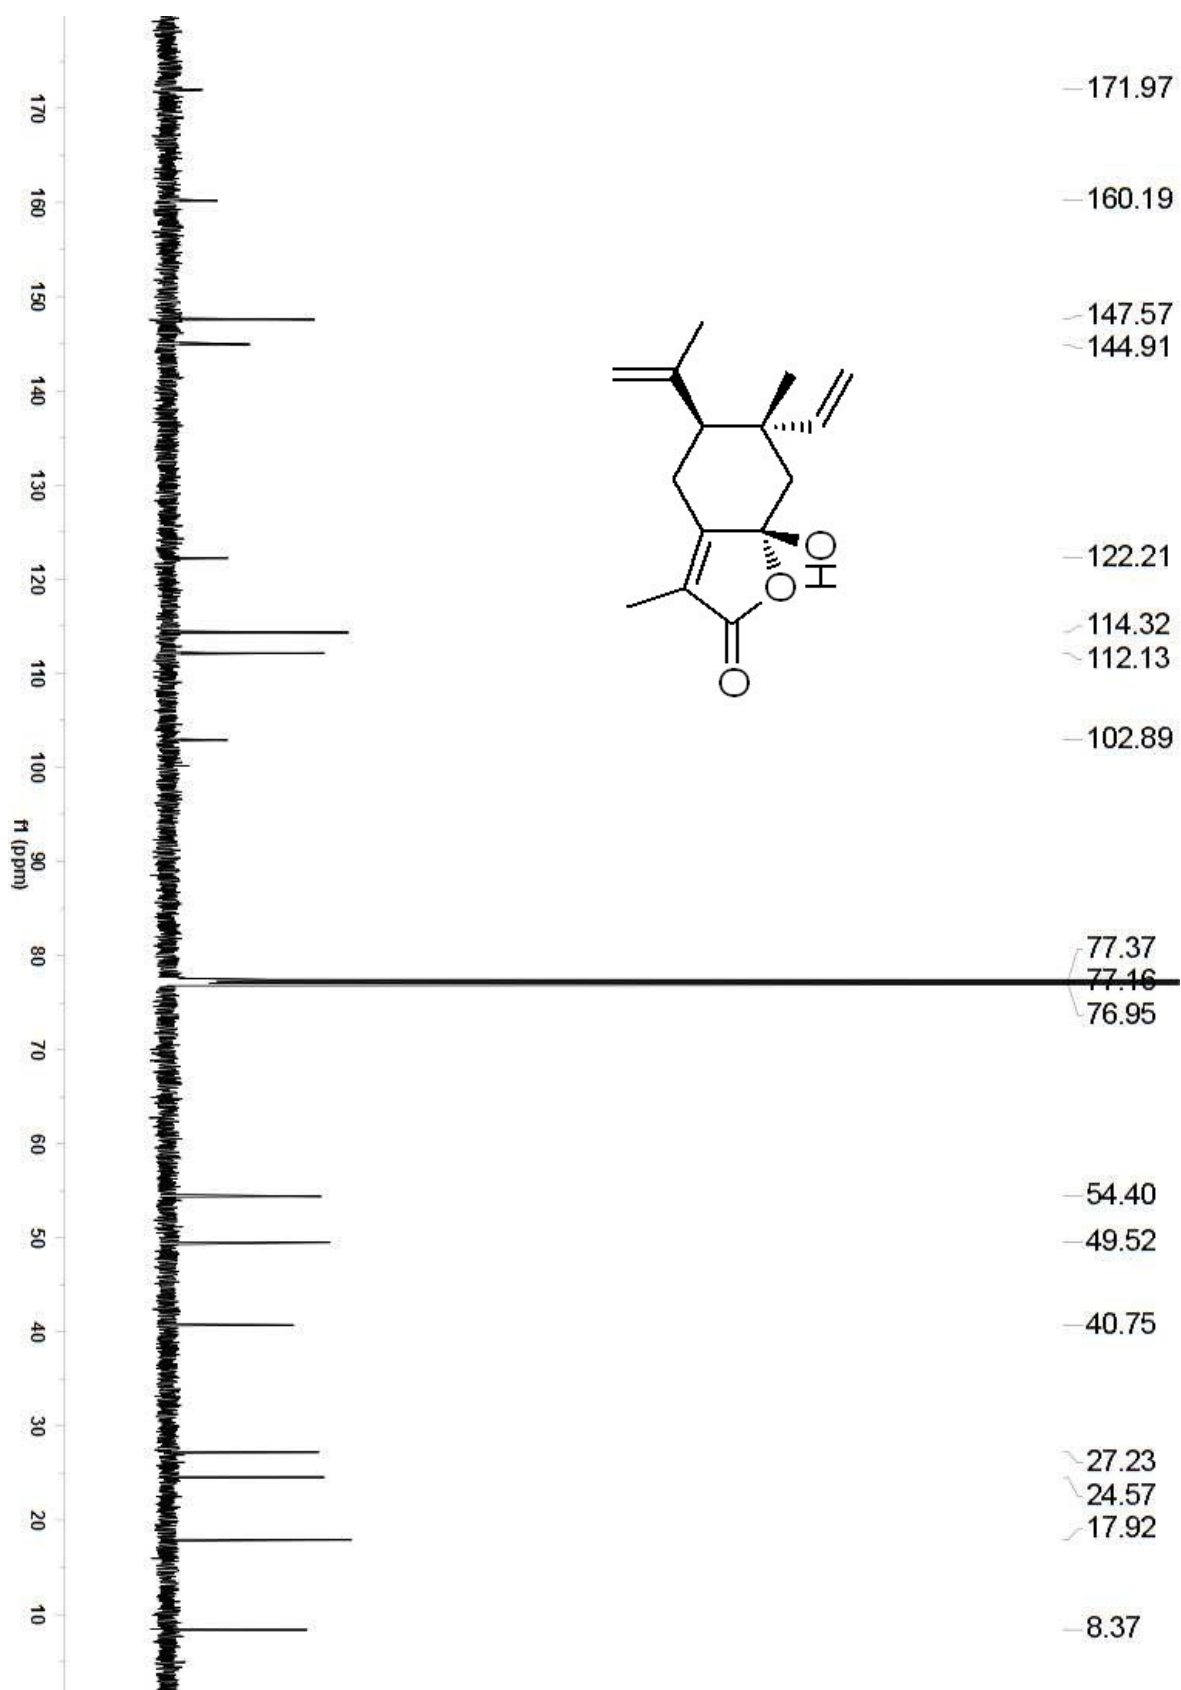

<sup>1</sup>H NMR spectra of compounds **6a** and **6b** (diastereomixture) in CD<sub>3</sub>OD (600 MHz)

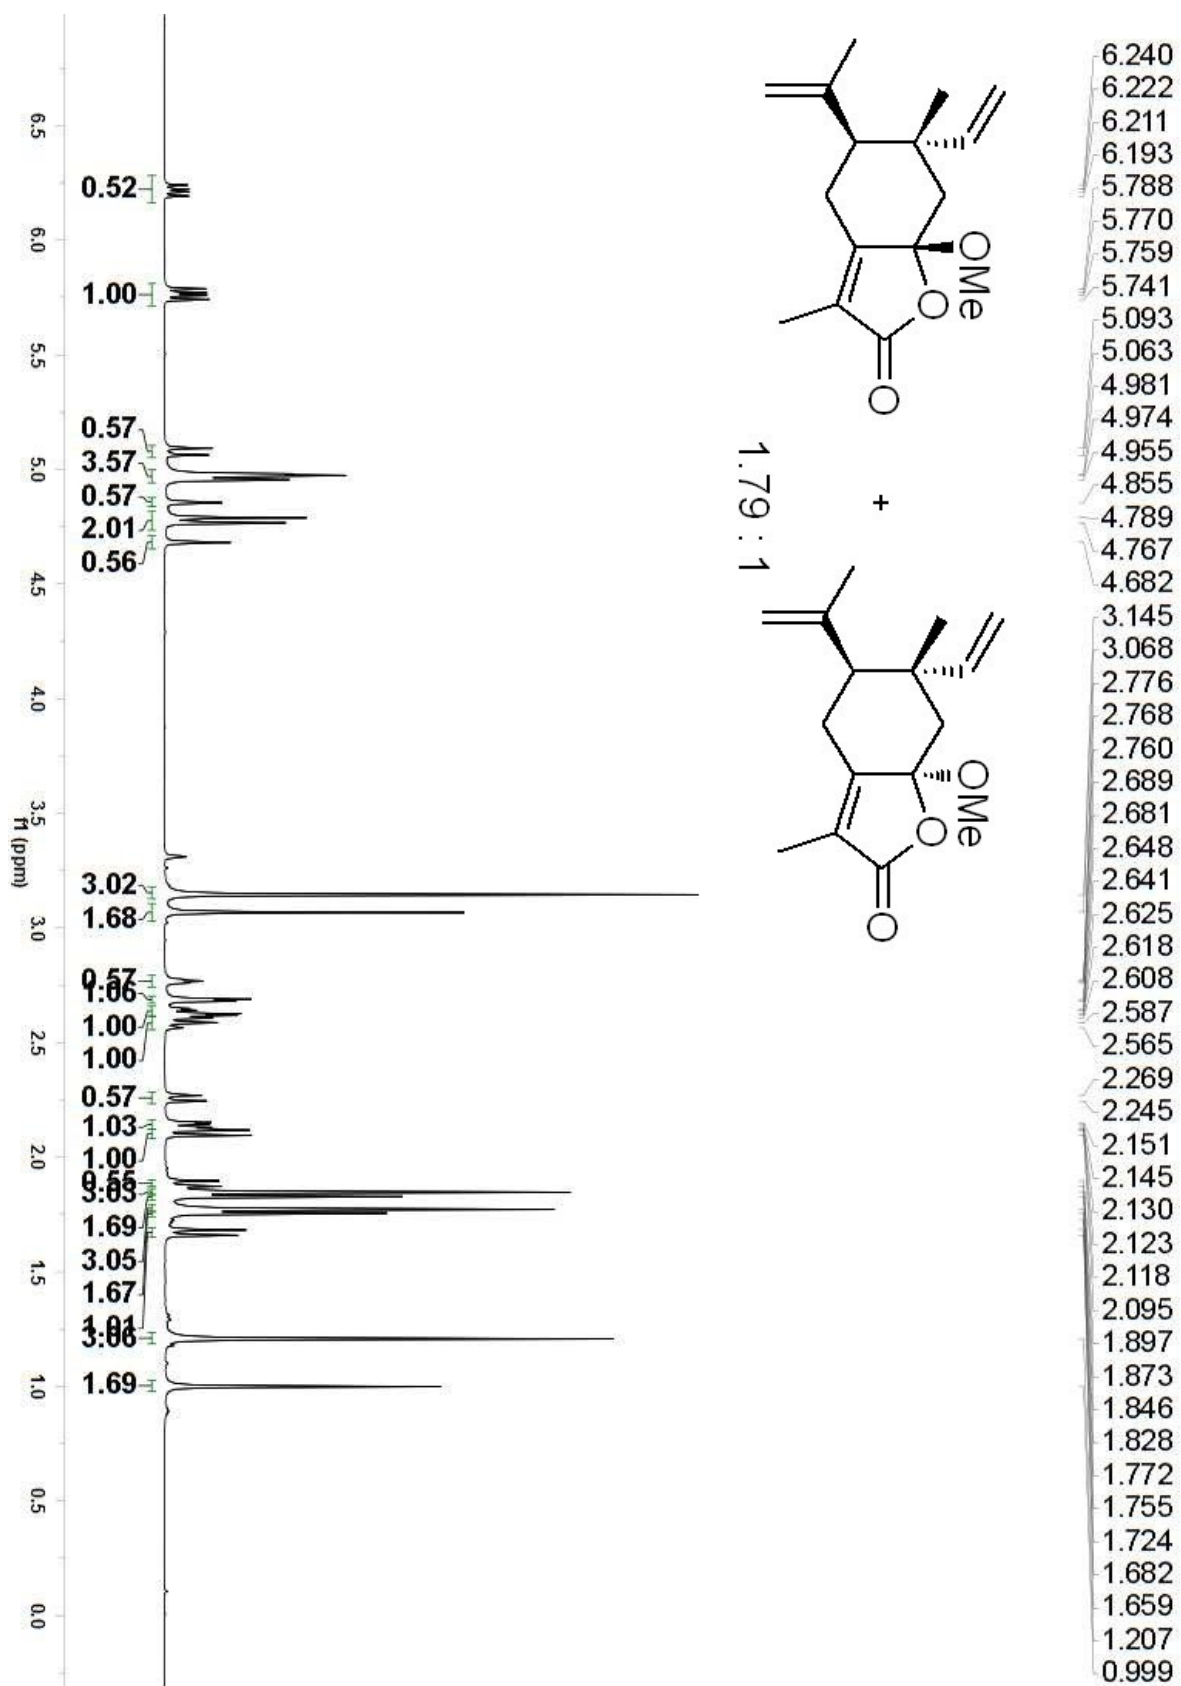

$^{13}\text{C}$  NMR spectra of compounds **6a** and **6b** (diastereomixture) in  $\text{CD}_3\text{OD}$  (150 MHz)

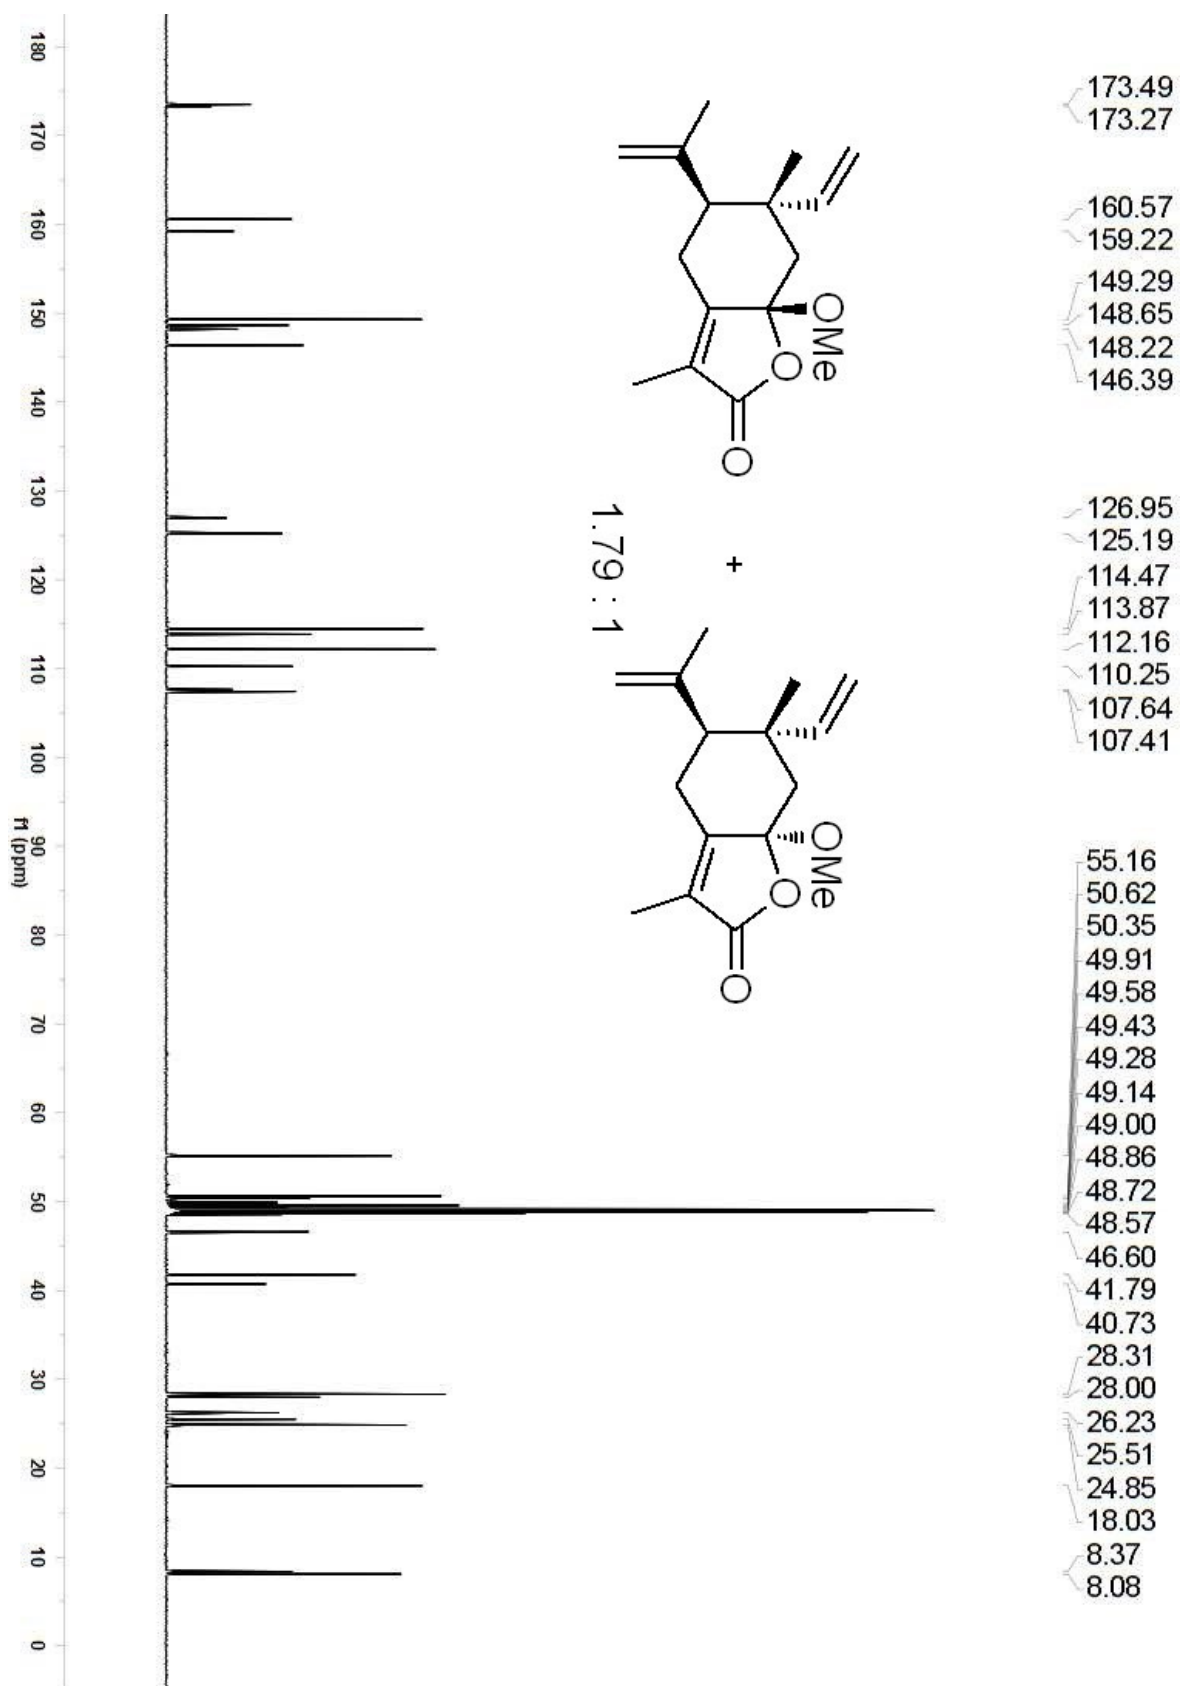

<sup>1</sup>H NMR spectra of compound **6a** in CD<sub>3</sub>OD (600 MHz)

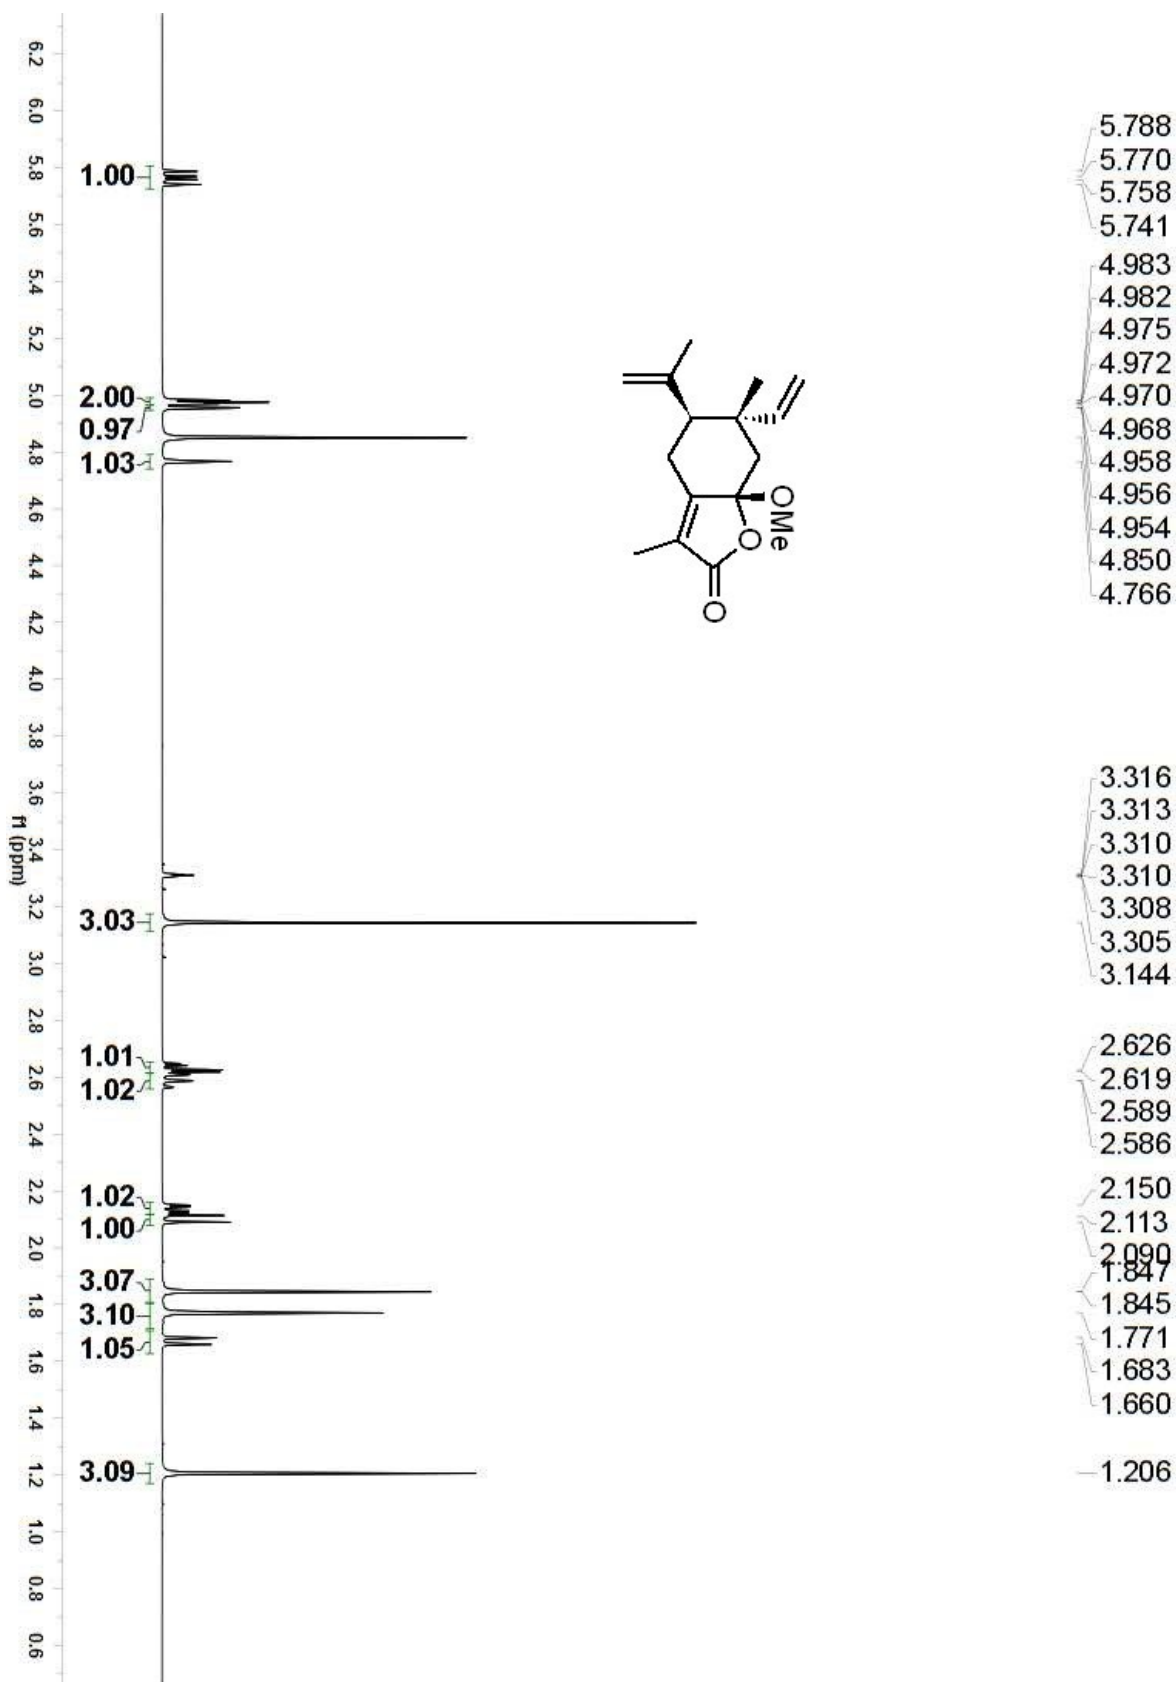

<sup>13</sup>C NMR spectra of compound **6a** in CD<sub>3</sub>OD (150 MHz)

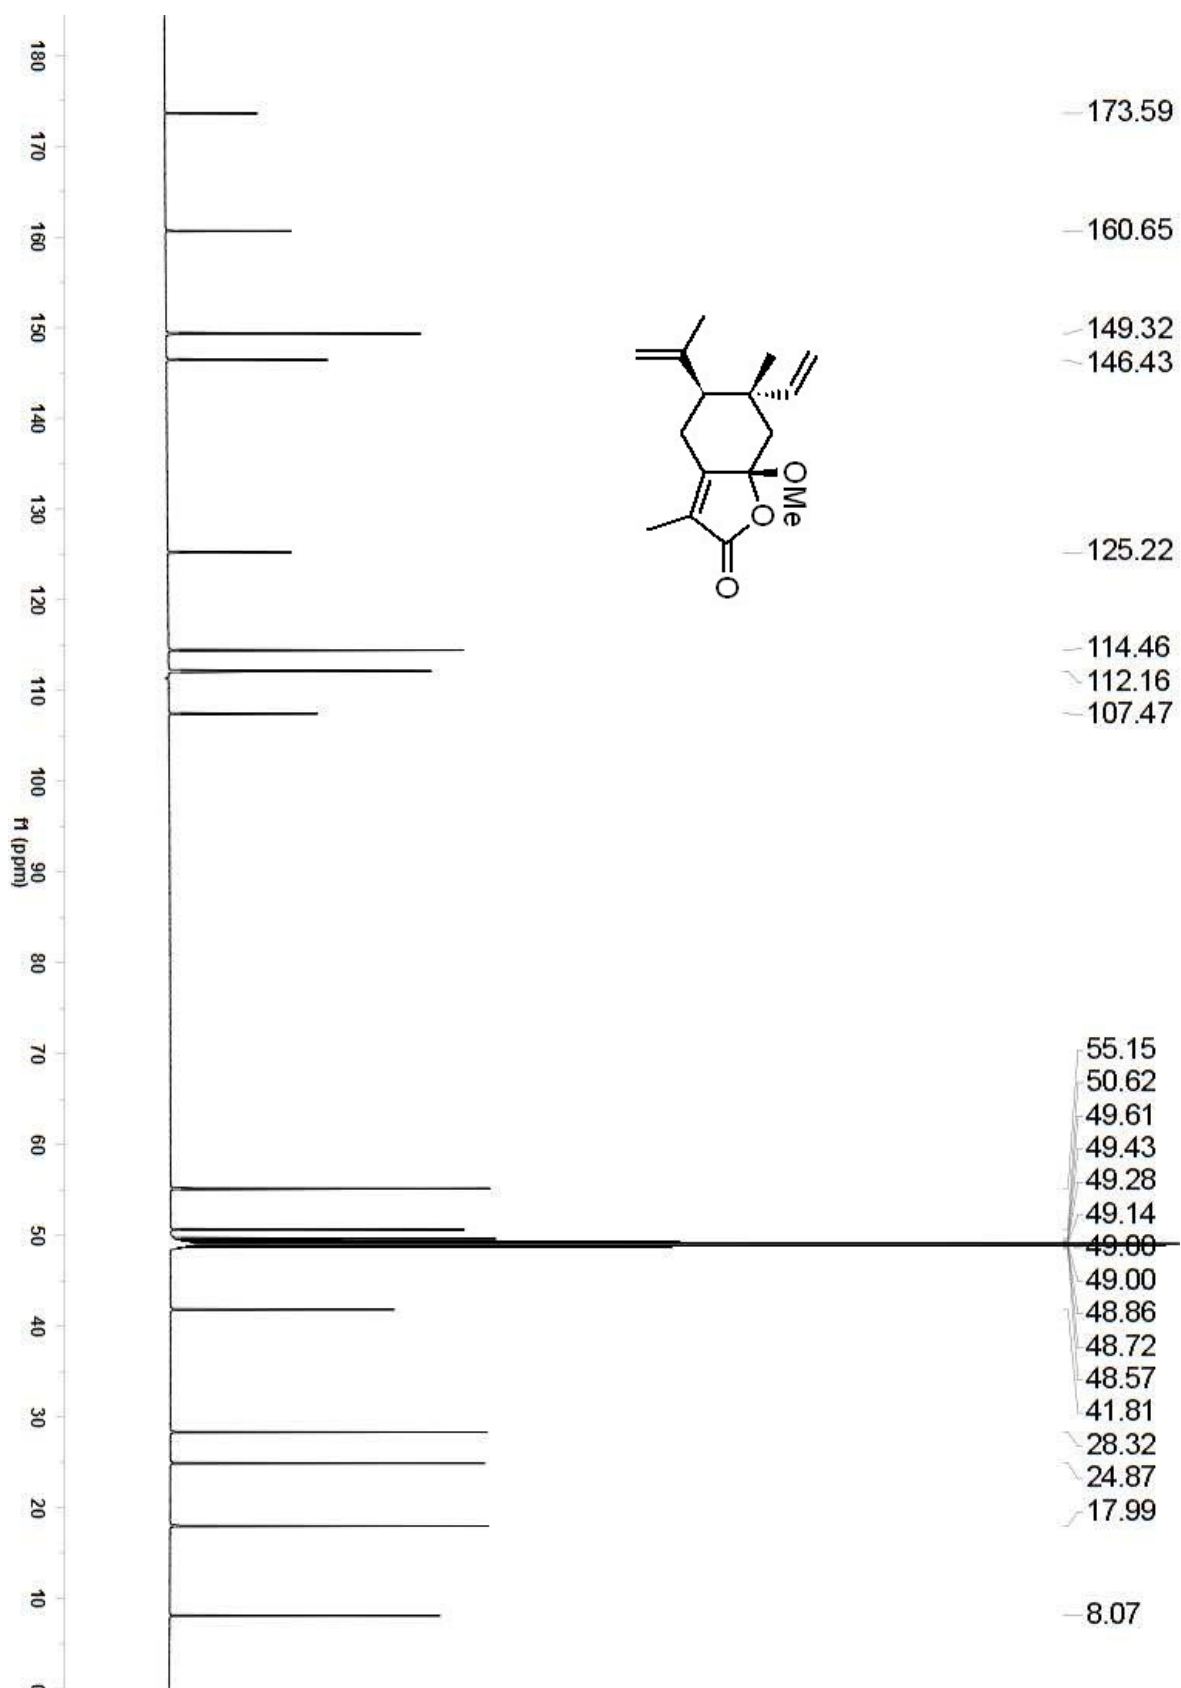



DEPT spectra of compound **6a** in CD<sub>3</sub>OD

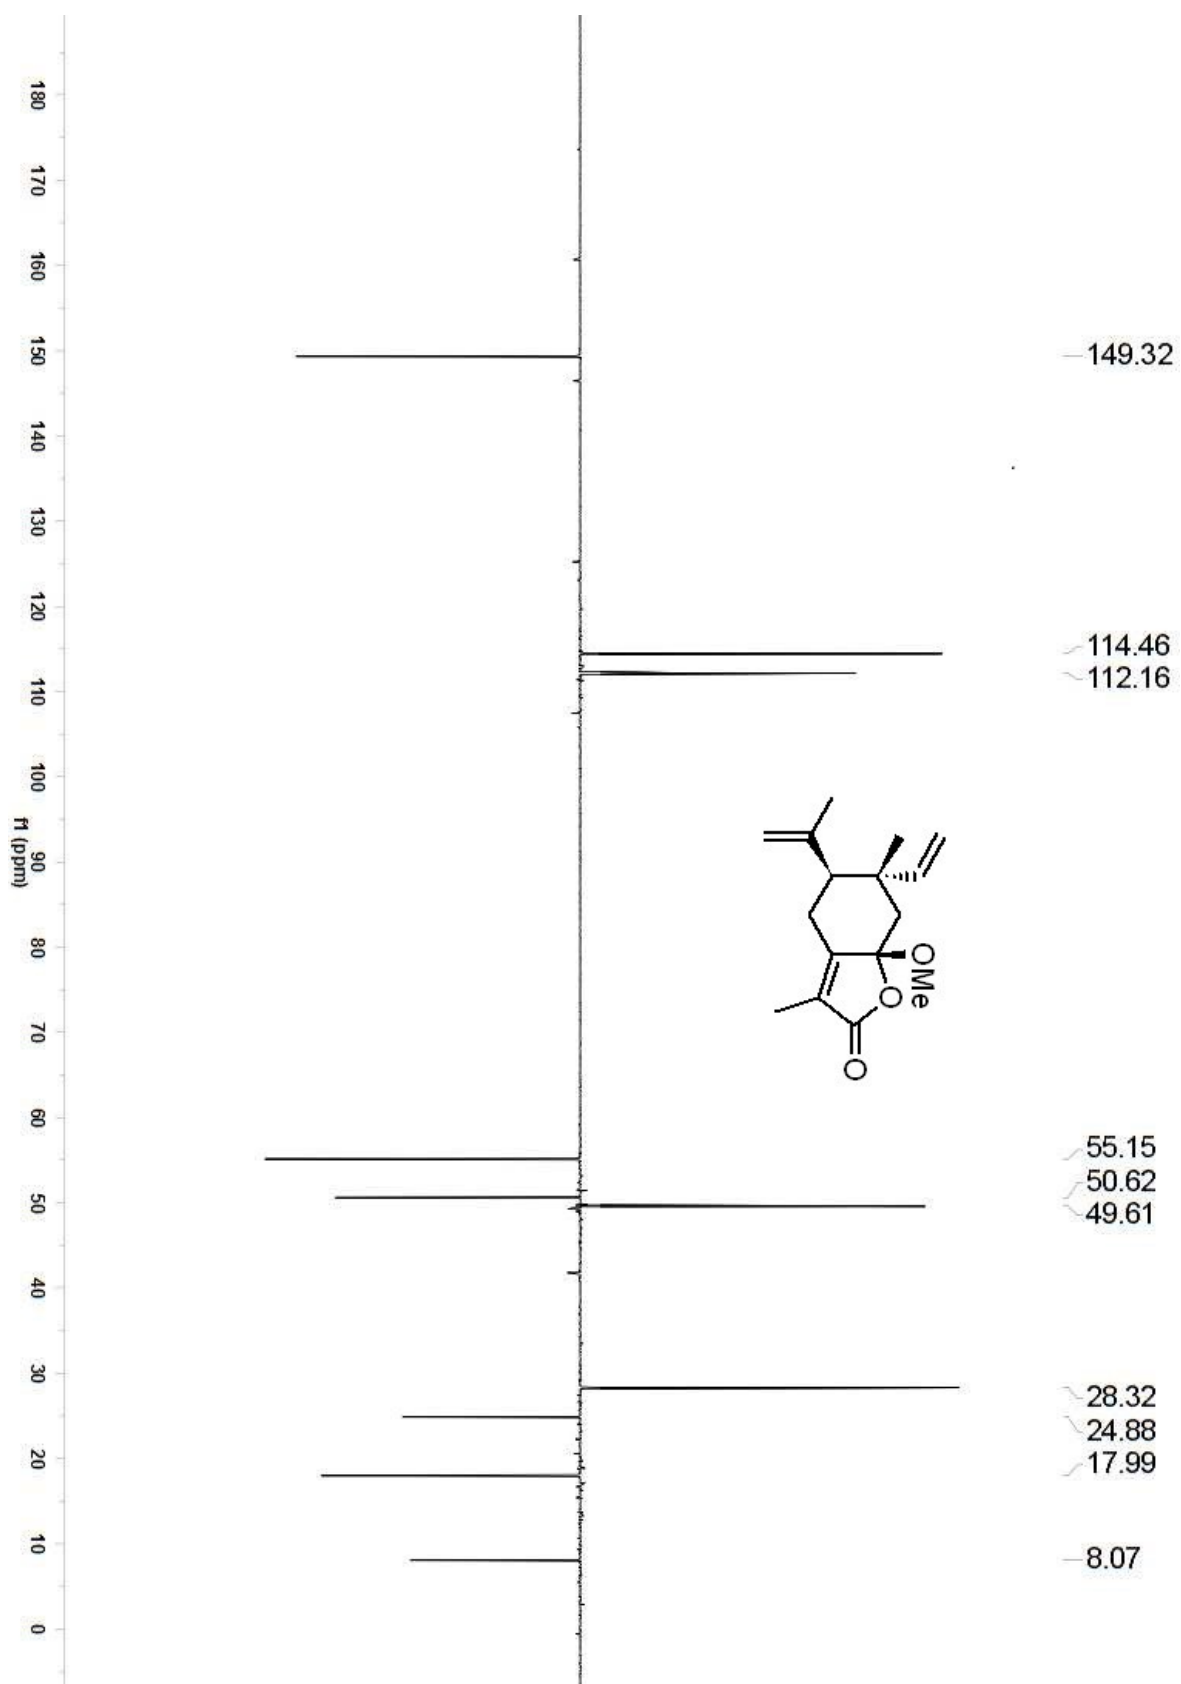

HSQC spectra of compound **6a** in CD<sub>3</sub>OD

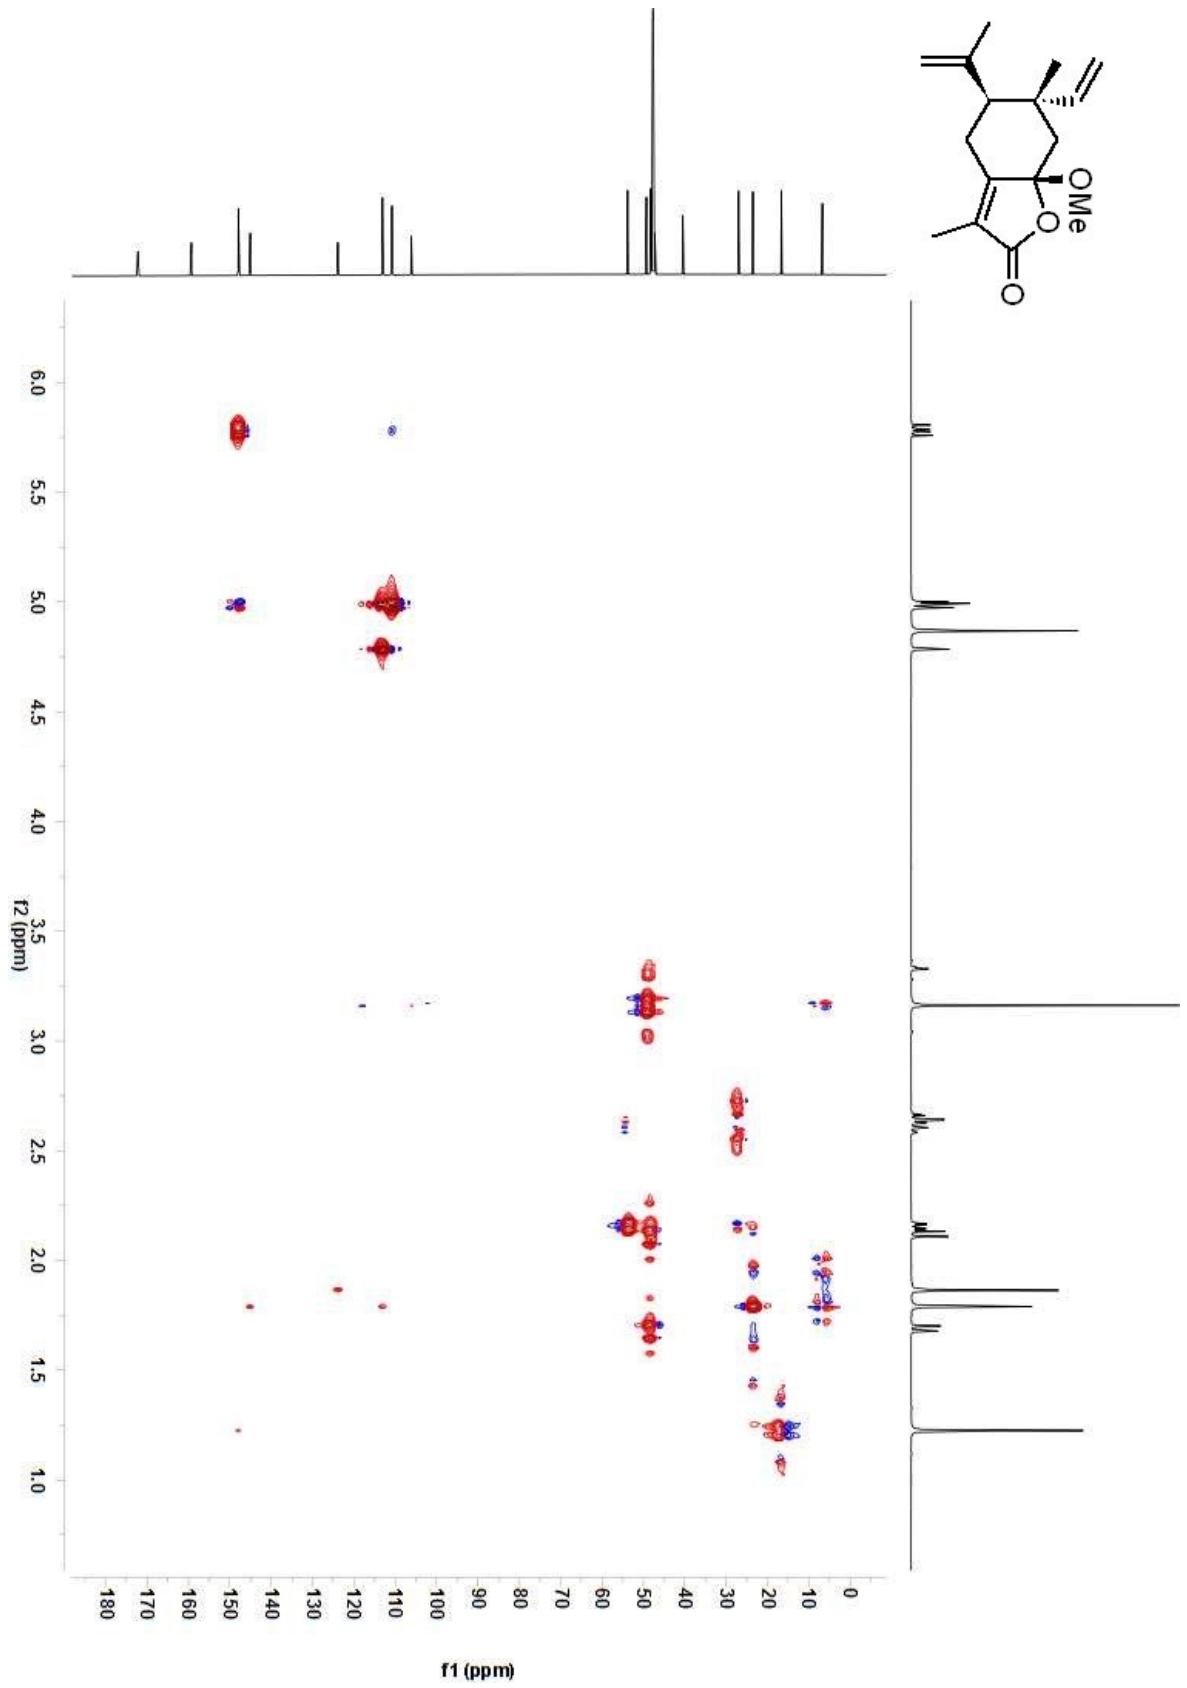

HMBC spectra of compound **6a** in CD<sub>3</sub>OD

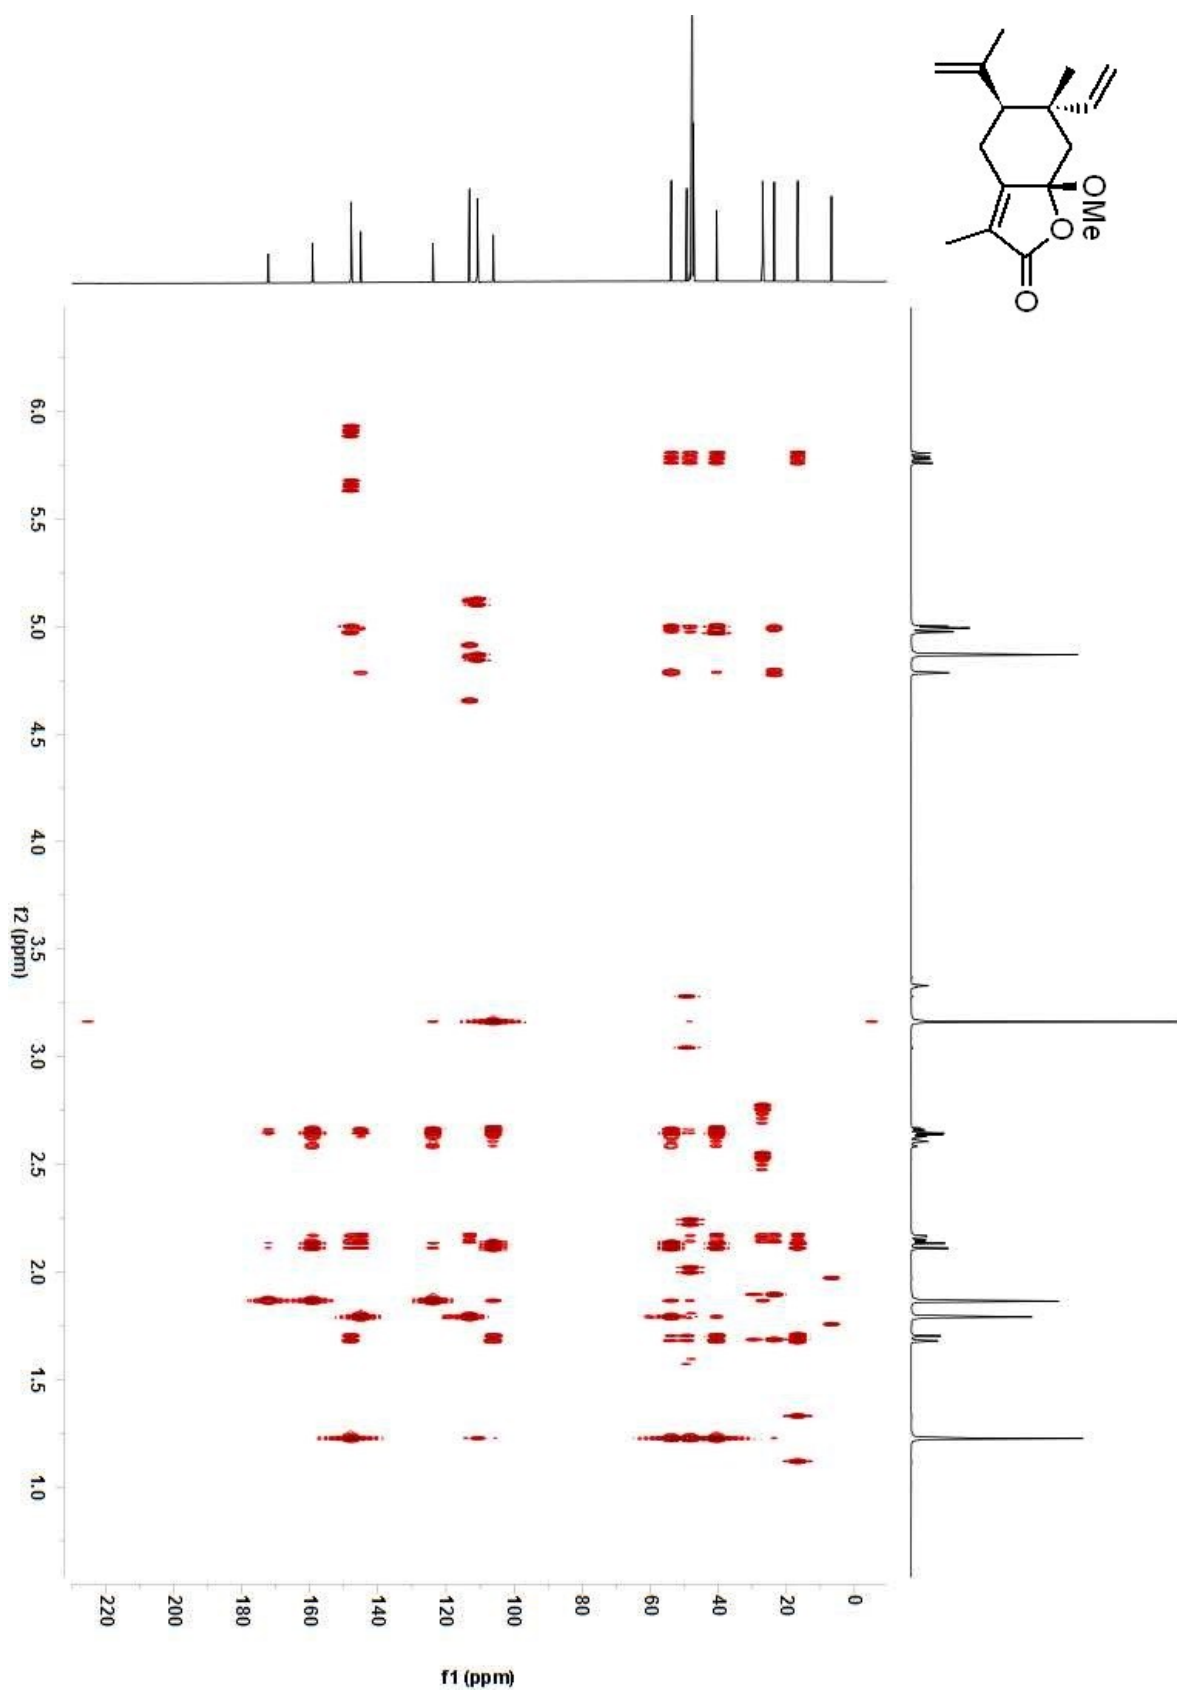

NOESY spectra of compound **6a** in CD<sub>3</sub>OD

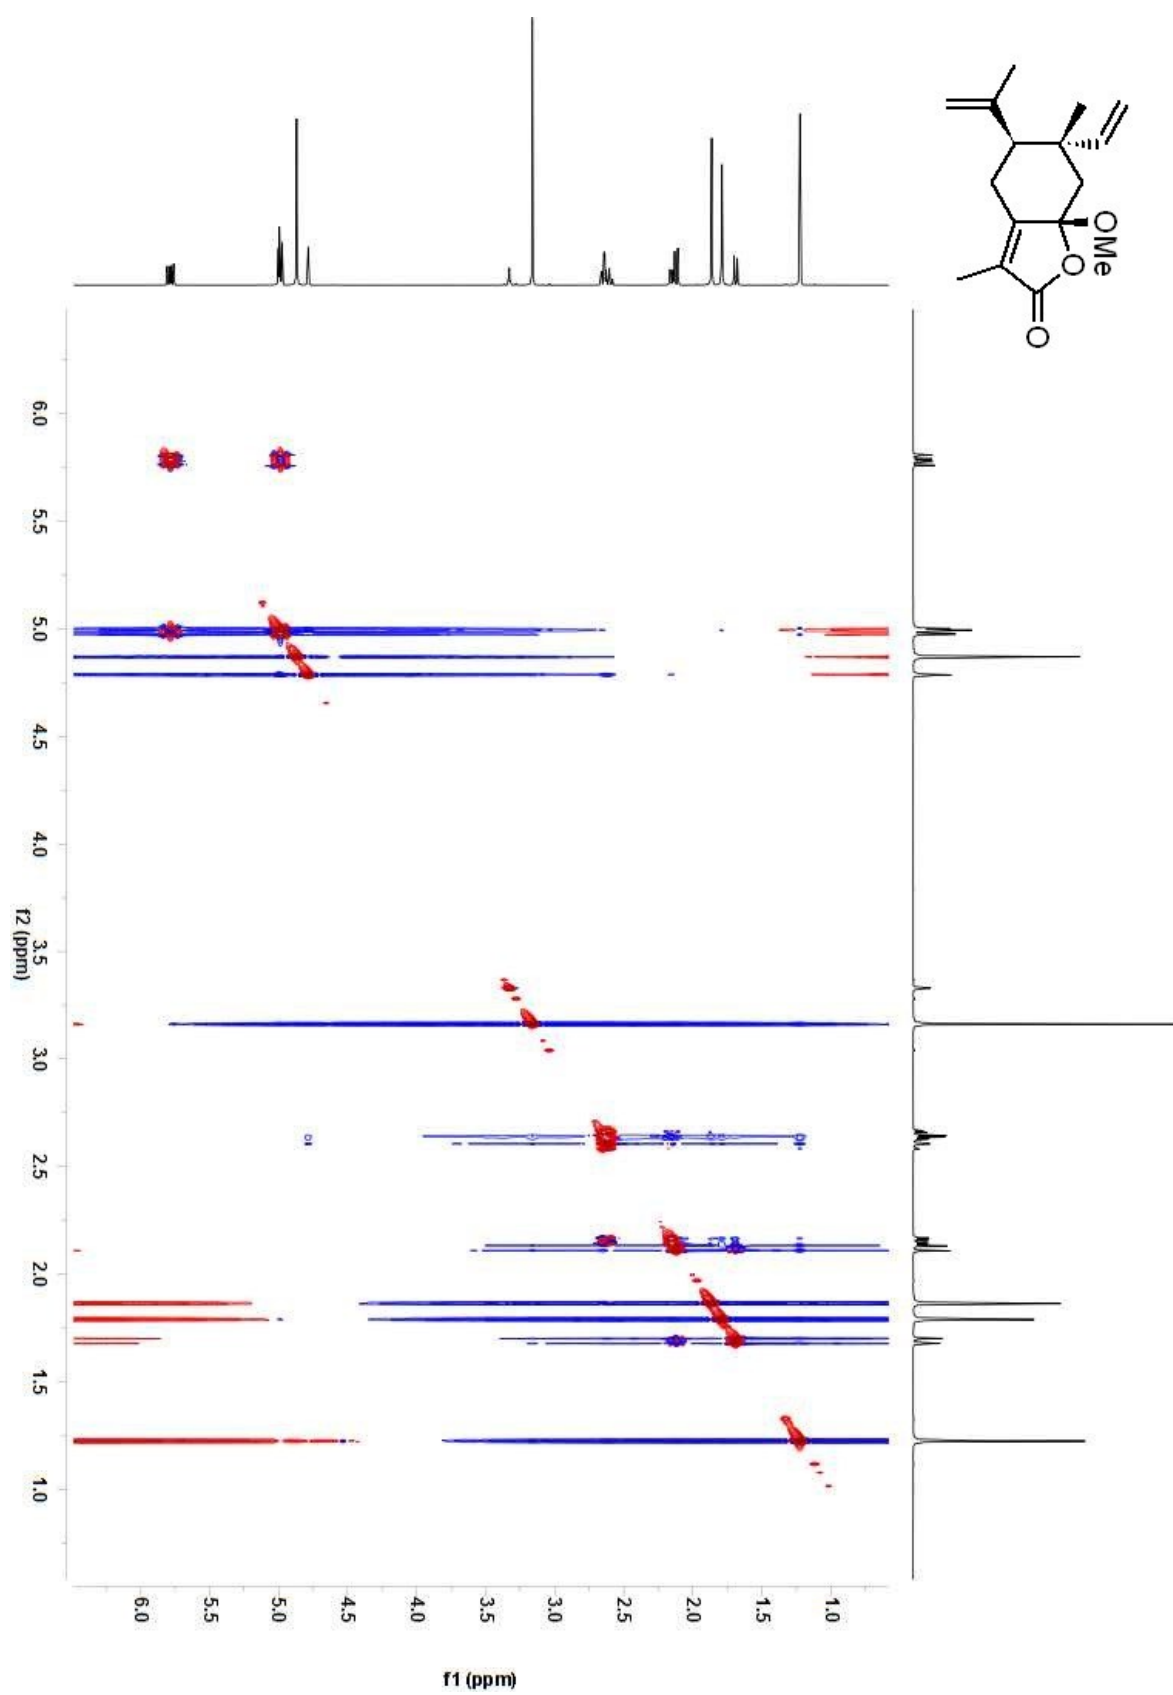

<sup>1</sup>H NMR spectra of compound **6b** in CD<sub>3</sub>OD (600 MHz)

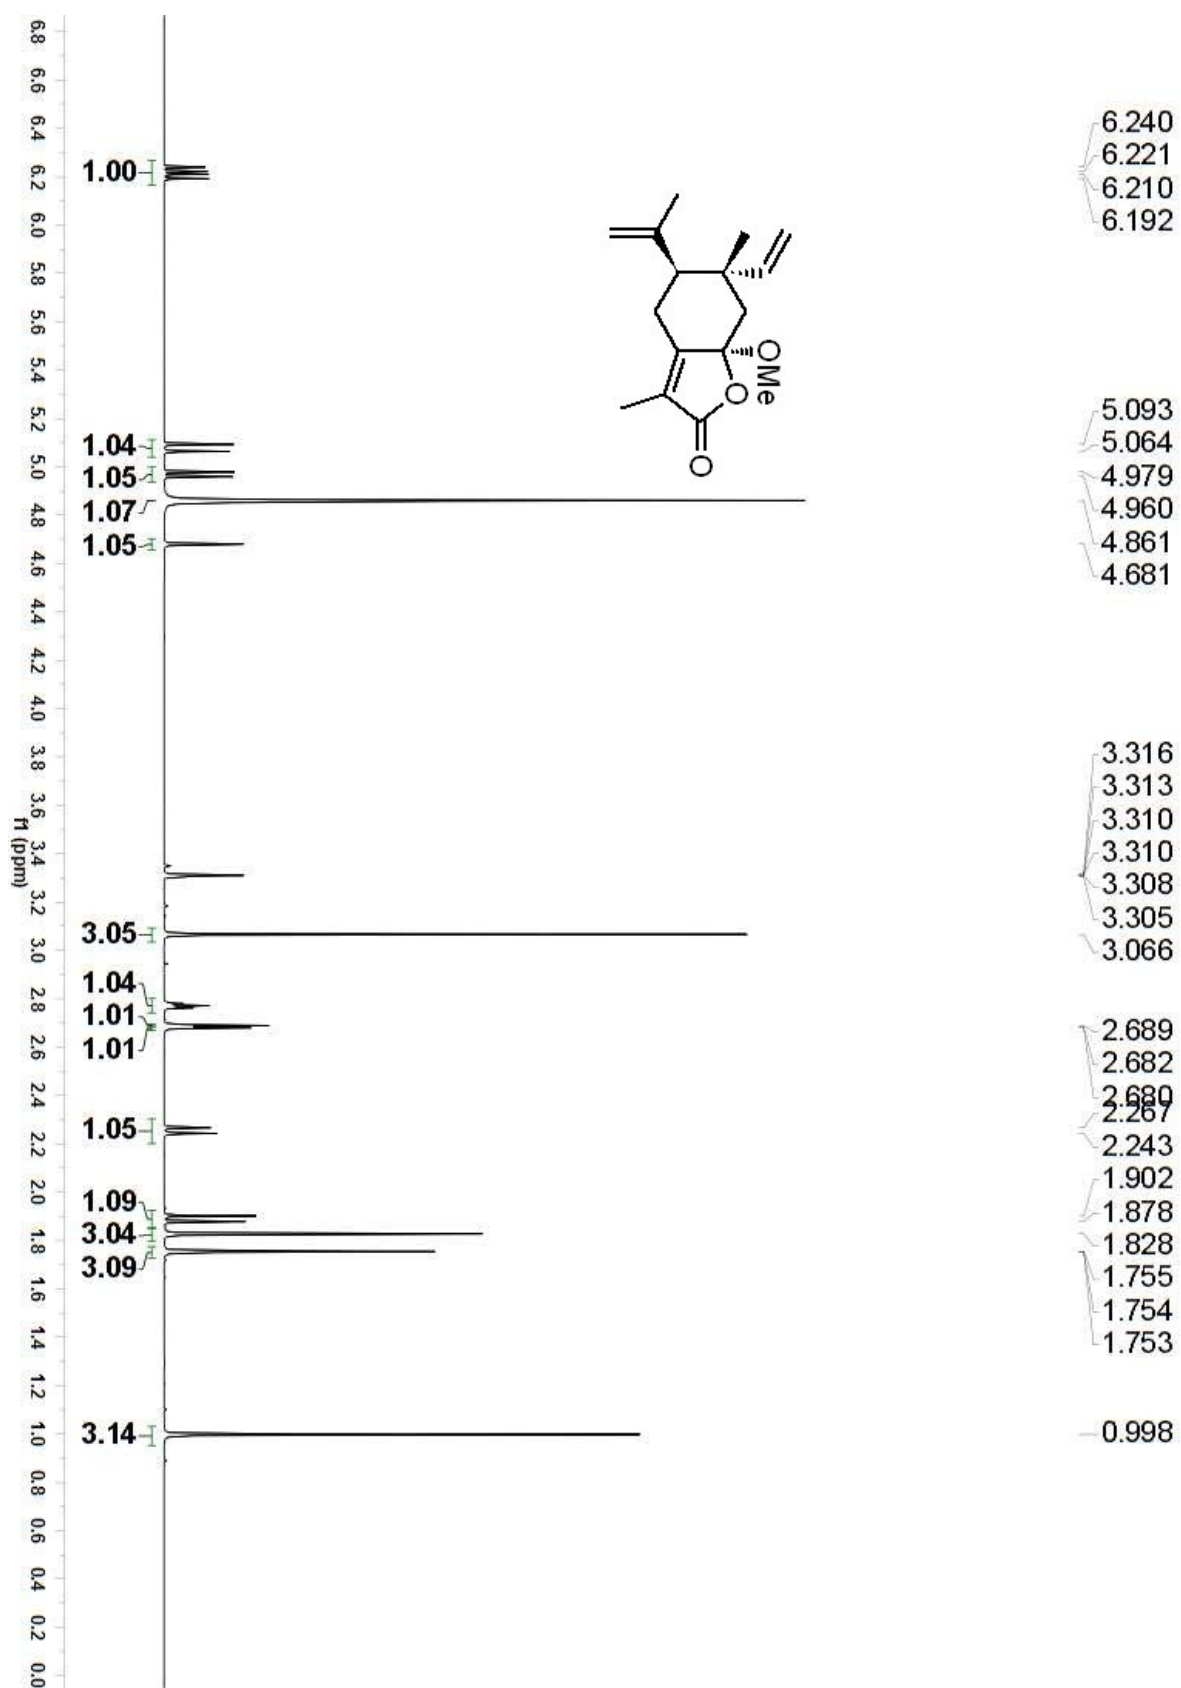

$^{13}\text{C}$  NMR spectra of compound **6b** in  $\text{CD}_3\text{OD}$  (150 MHz)

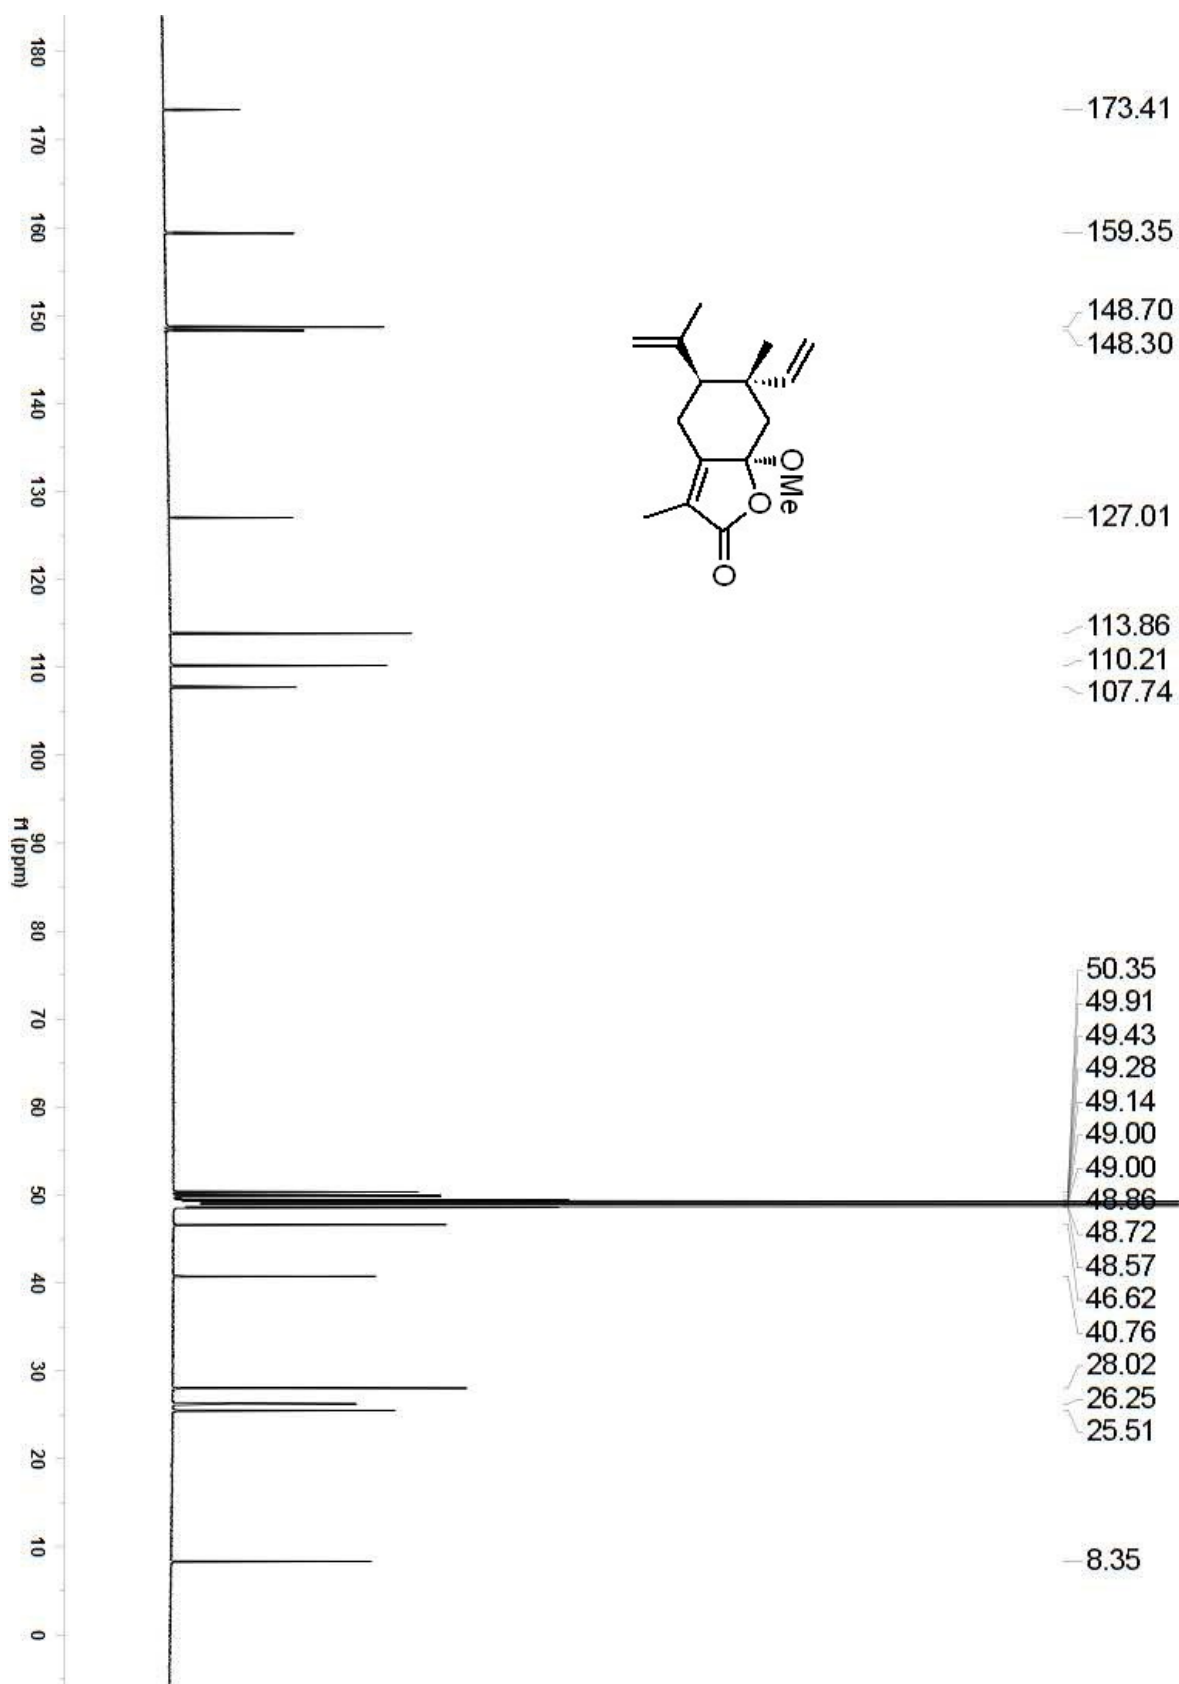

DEPT spectra of compound **6b** in CD<sub>3</sub>OD

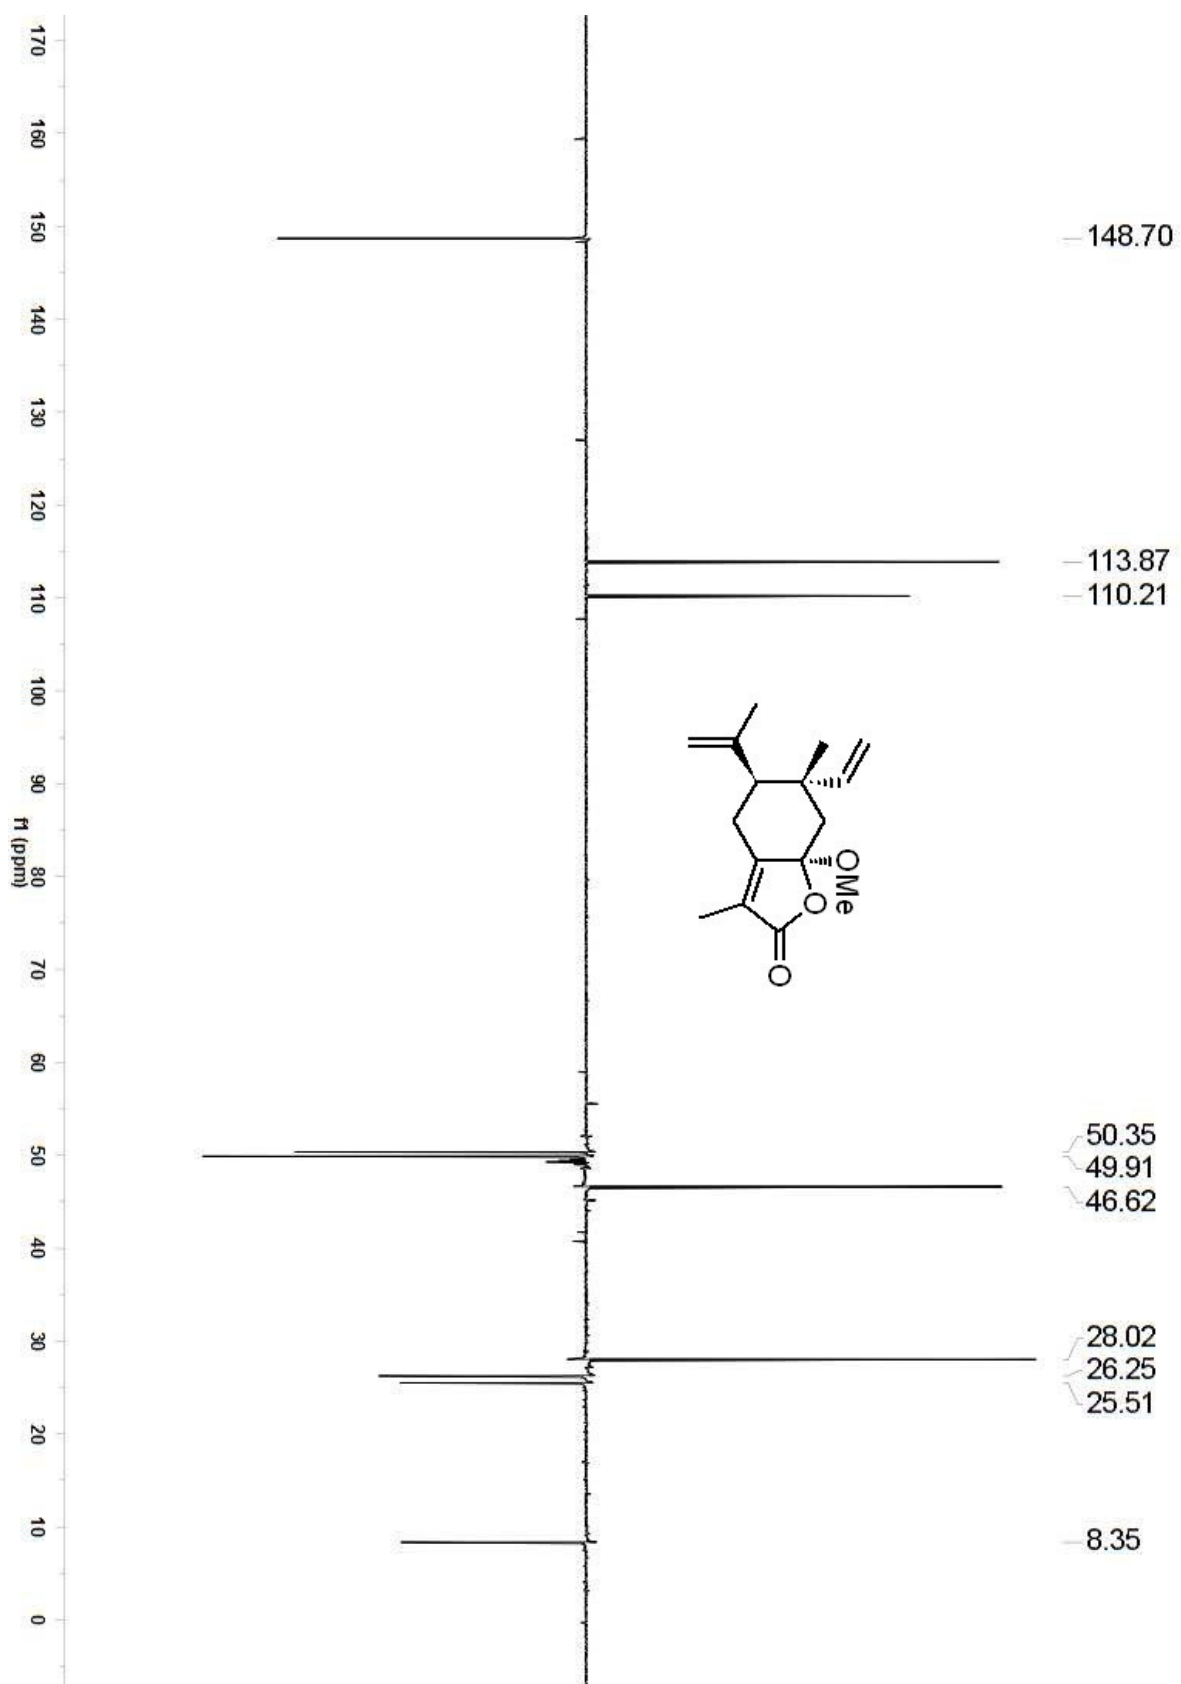

HSQC spectra of compound **6b** in CD<sub>3</sub>OD

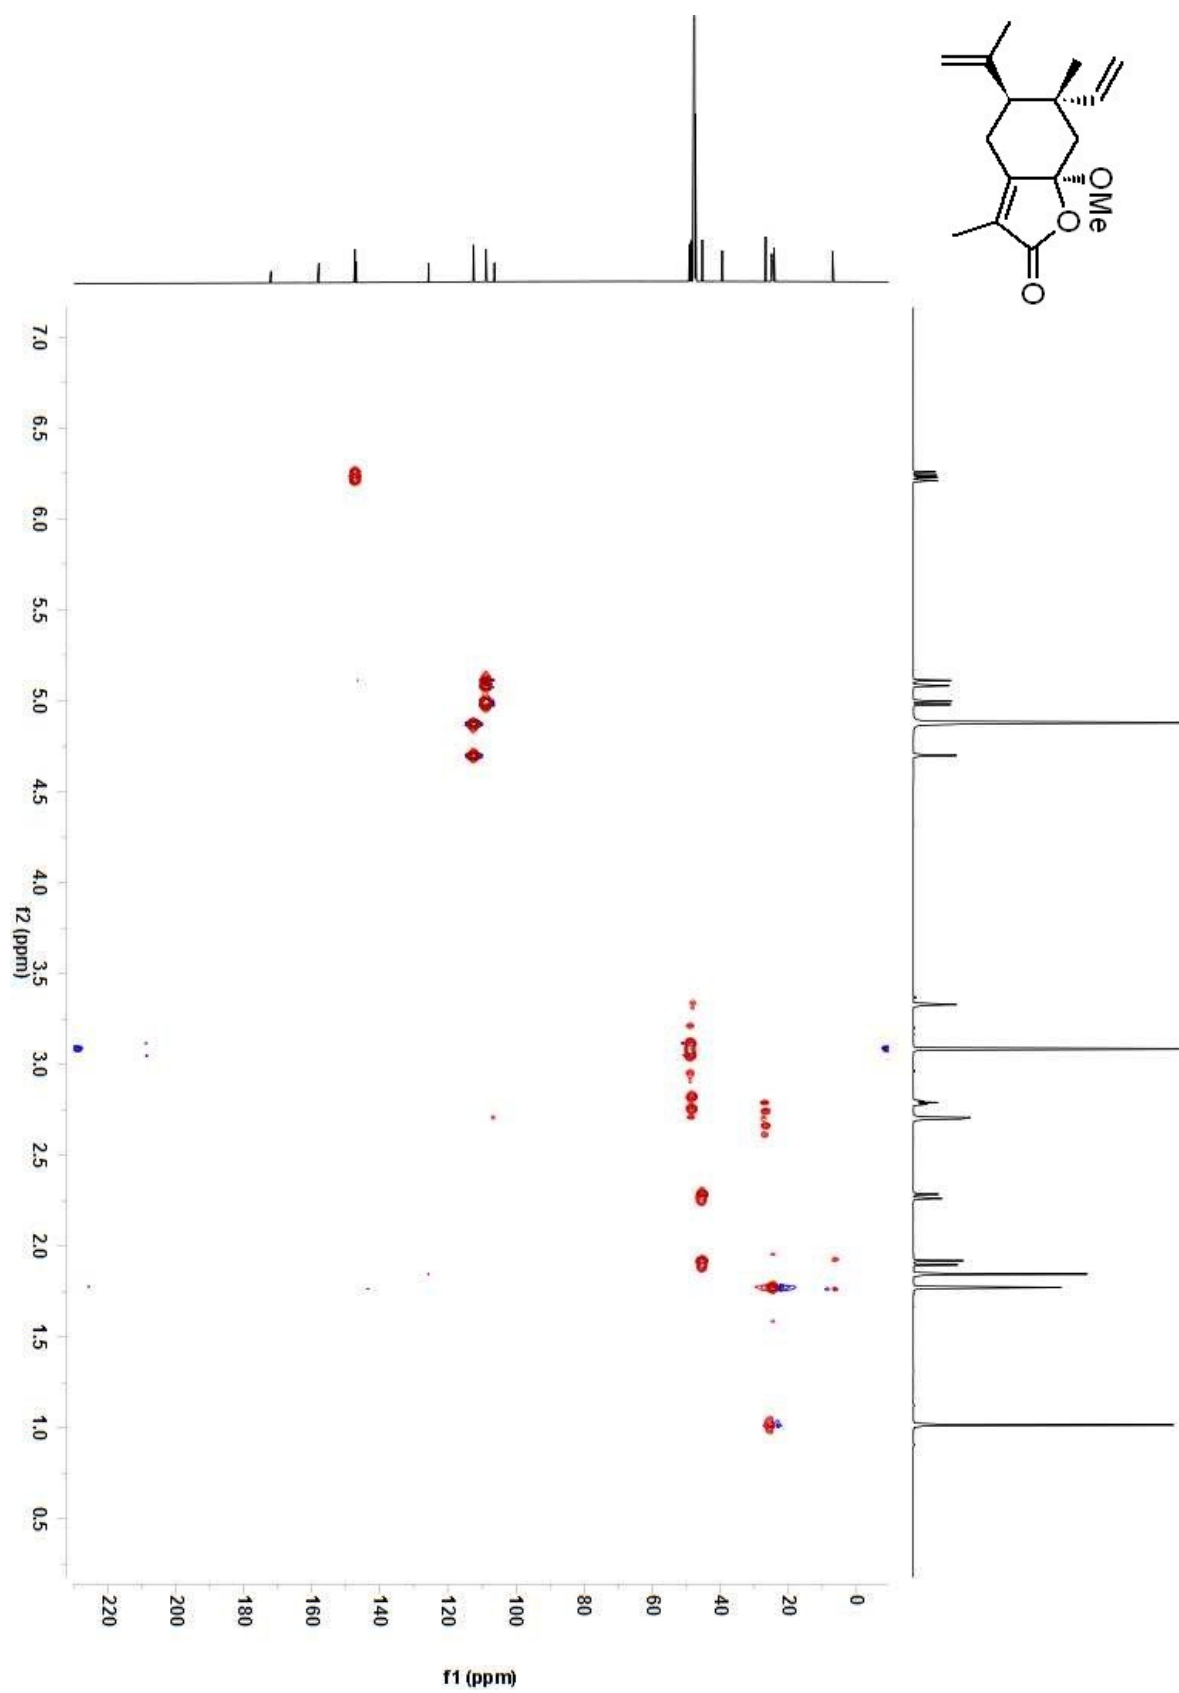



HMBC spectra of compound **6b** in CD<sub>3</sub>OD

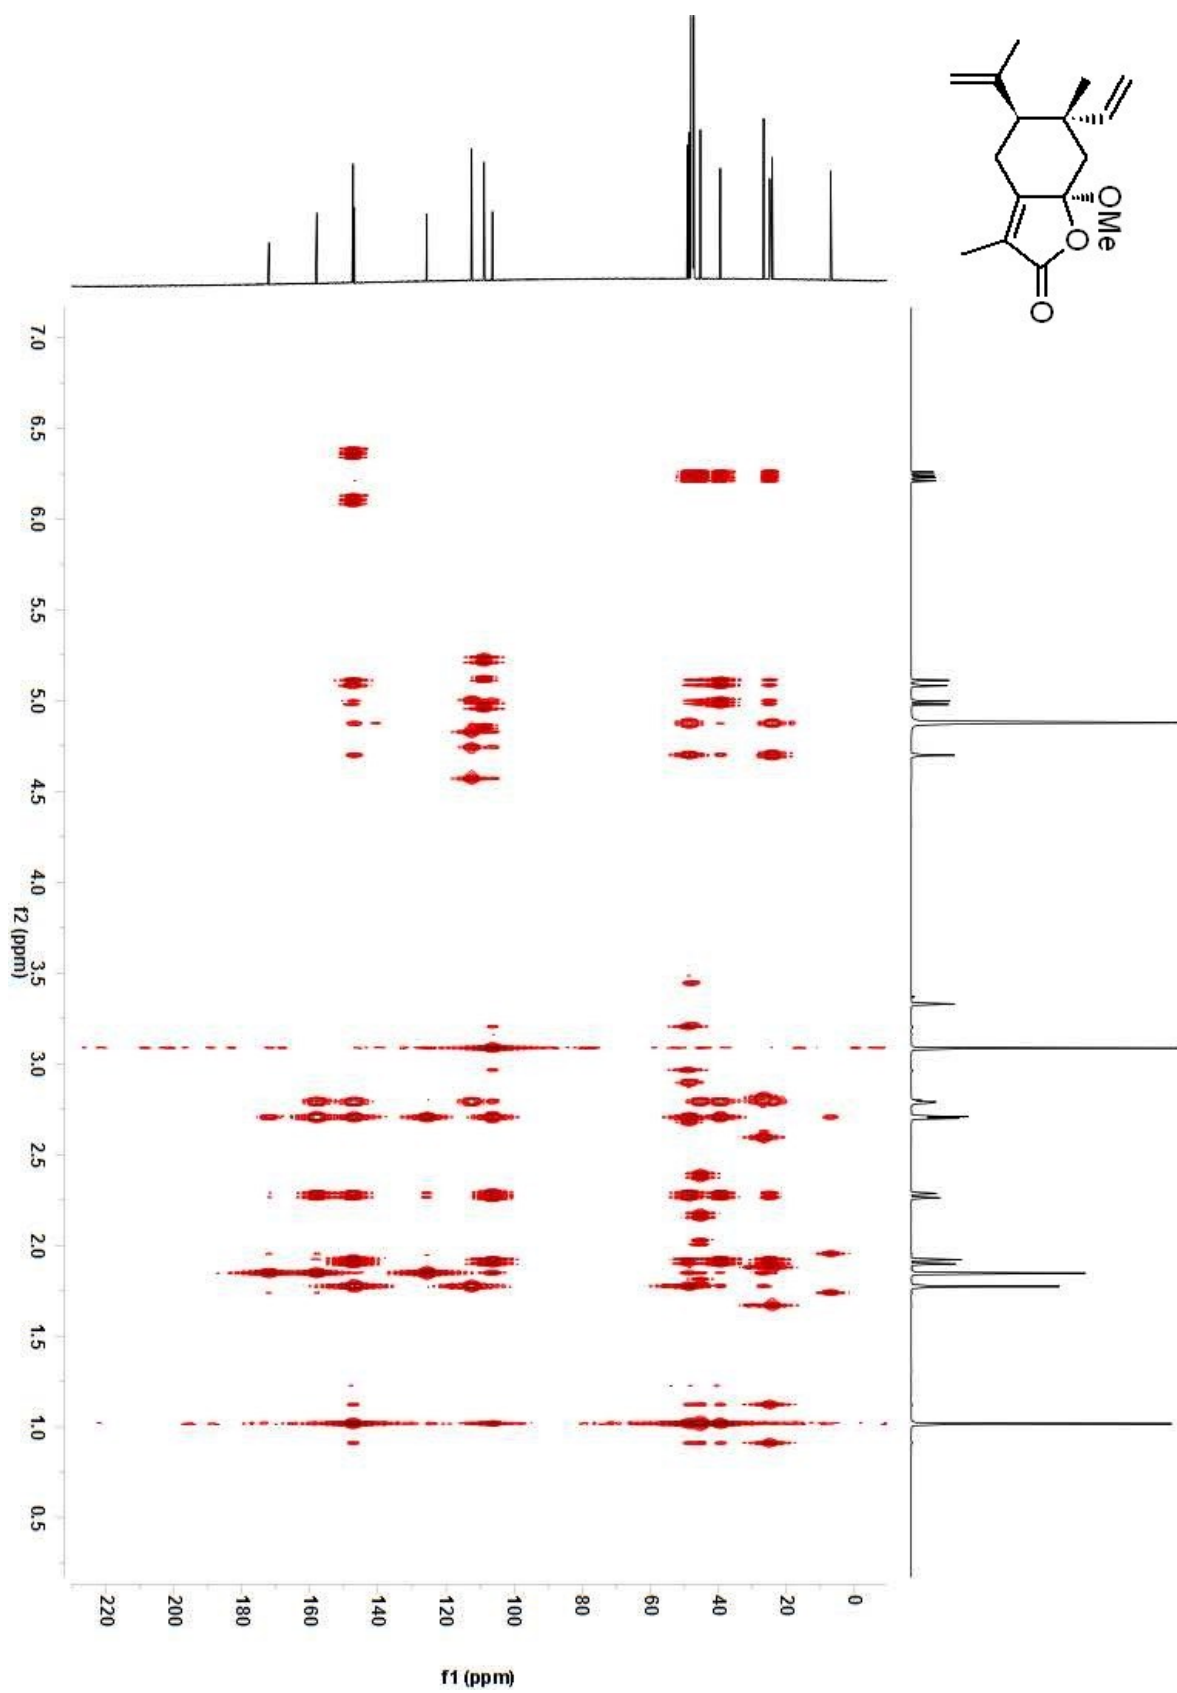

NOESY spectra of compound **6b** in CD<sub>3</sub>OD

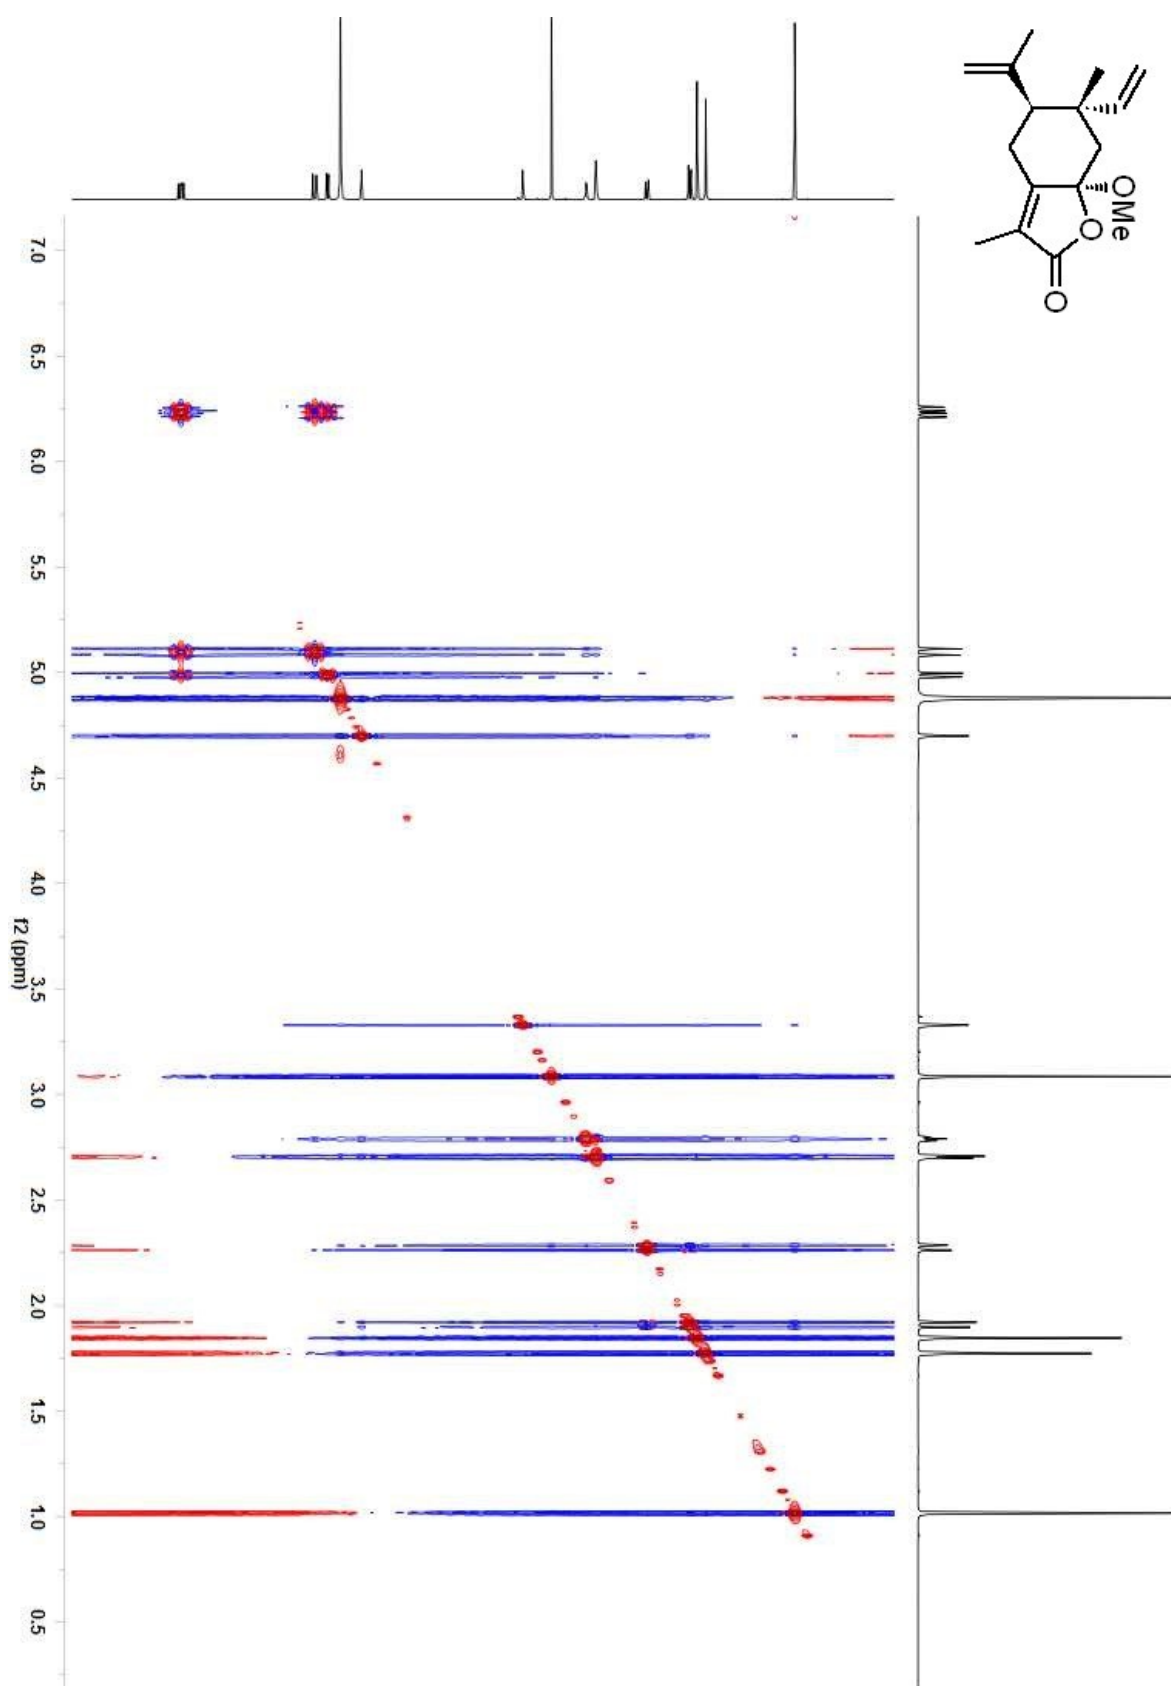

Supplement: c8ob02005a1.pdf [file c8ob02005a1.pdf]
